# Supplementary material for: DddA homolog search and engineering expand sequence compatibility of mitochondrial base editing
Source: PubMed Central journal article supplement (PMC9935910; doi:10.1038/s41467-023-36600-2), 2023-02-16

# **Supplementary Information**

## **DddA homolog search and engineering expand sequence compatibility of mitochondrial base editing**

Mi et al.

\*To whom correspondence should be addressed to. Tel: +8610-62766945; Fax: +8610-62766945;

Email: yangming.wang@pku.edu.cn (YW)

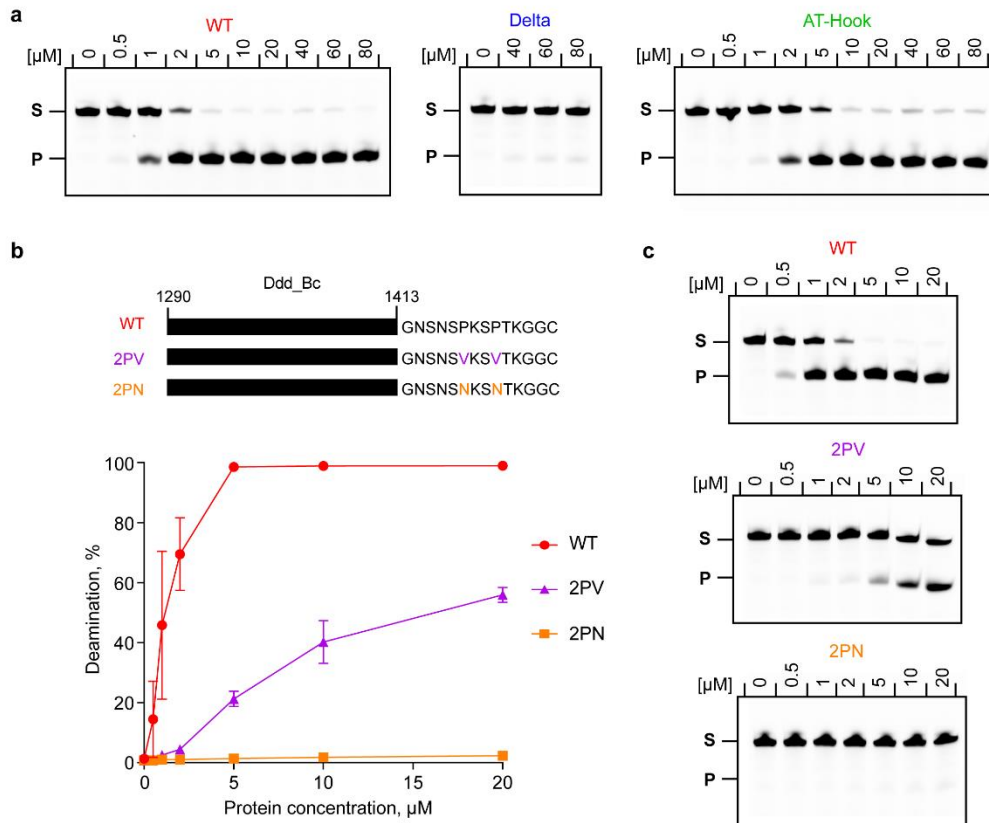

**Supplementary Fig. 1 | SPKK-related motifs are important for the deamination activity of Ddd\_Bc.** **a**, In vitro cytidine deamination assays by wild type Ddd\_Bc (WT), Ddd\_Bc with two SPKK-related motifs removed (Delta), and Delta rescued with AT- hook sequence (AT-Hook) on 6-Carboxyfluorescein (FAM) labelled dsDNA substrate (S). The DNA sequence is 5'-FAM-ATATTATTTATTTTCATTTTATTTATTATA-3'. Cytidine deamination leads to products (P) with increased mobility. The samples derive from the same experiment and that gels were processed in parallel. Gels are representatives from  $n = 3$  independent experiments. **b**, Quantification of the relative amounts of deamination product versus protein concentration for Ddd\_Bc (WT) and two Ddd\_Bc variants (2PV, 2PN), top shows the schematic of constructs. Associate gels are shown in **c**. Shown are mean  $\pm$  SD;  $n = 3$  independent experiments. **c**, In vitro cytidine deamination assays by wild type Ddd\_Bc (WT) and two Ddd\_Bc variants (2PV, 2PN) on 6-FAM labelled dsDNA. The sequence of dsDNA substrate is the same as shown in **a**. The samples derive from the same experiment and gels were processed in parallel. Gels are representatives from  $n = 3$  independent experiments. Source data are provided as a Source Data file.

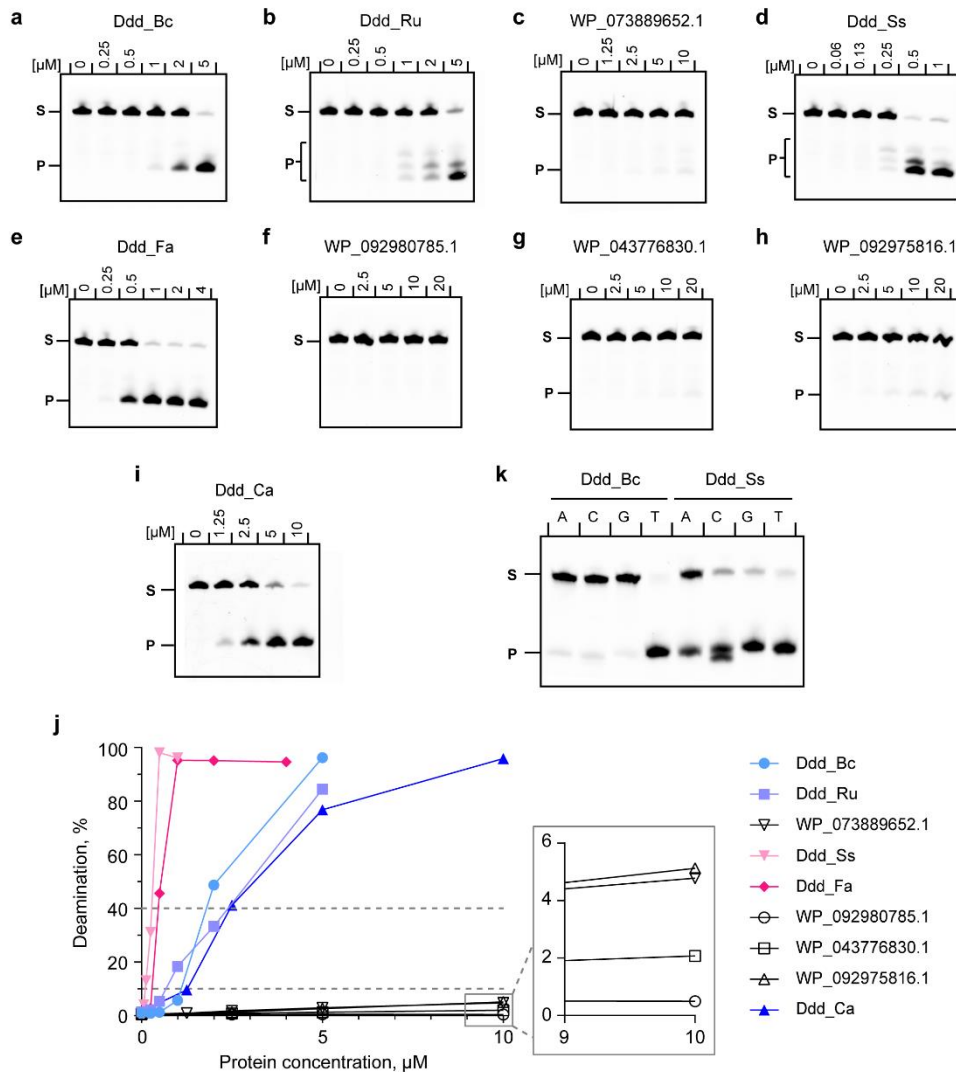

**Supplementary Fig. 2 | Verification of deaminase activity for candidate Ddd\_Bc homologs. a-i.** In vitro cytidine deamination assays using a double-stranded 5'-FAM-ATATTTTCACGCCATTTATTA-3' DNA substrate, which contains AC, TC, CC and GC, with Ddd\_Bc (**a**), Ddd\_Ru (**b**), WP\_073889652.1 (**c**), Ddd\_Ss (**d**), Ddd\_Fa (**e**), WP\_092980785.1 (**f**), WP\_043776830.1 (**g**), WP\_092975816.1 (**h**) and Ddd\_Ca (**i**). The samples derive from the same experiment and gels were processed in parallel. Gels are representatives of  $n = 2$  independent experiments. **j**, Quantification of the relative amounts of deamination product versus protein concentration for Ddd\_Bc and candidate Ddd\_Bc homologs, associated gels are shown in **a-i**. Shown are mean from  $n = 2$  independent experiments. **k**, In vitro cytidine deamination assays by Ddd\_Bc and Ddd\_Ss using 6-FAM labeled dsDNA substrate. The DNA sequence is 5'-FAM-ATATTATTTGNCATTTATTATA-3', and the N is indicated at the top of each lane. Shown is a

representative gel from  $n = 3$  independent experiments. Source data are provided as a Source Data file.

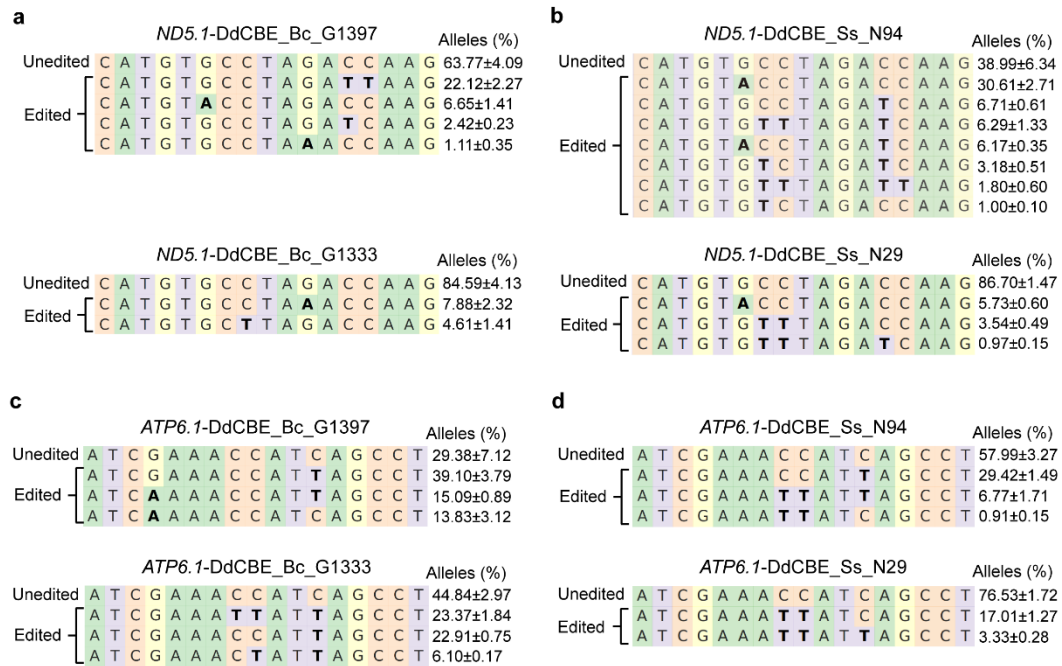

**Supplementary Fig. 3 | Allele compositions from mitochondrial editing by ND5.1-DdCBEs and ATP6.1-DdCBEs. a, b,** Frequencies of *MT-ND5* alleles produced by *ND5.1-DdCBE\_Bc* (a) with G1397 and G1333 split or *ND5.1-DdCBE\_Ss* (b) with N94 and N29 split. **c, d,** Frequencies of *MT-ATP6* alleles produced by *ATP6.1-DdCBE\_Bc* (c) with G1397 and G1333 split or *ATP6.1-DdCBE\_Ss* (d) with N94 and N29 split. Shown are mean ± SD; n = 3 independent experiments.

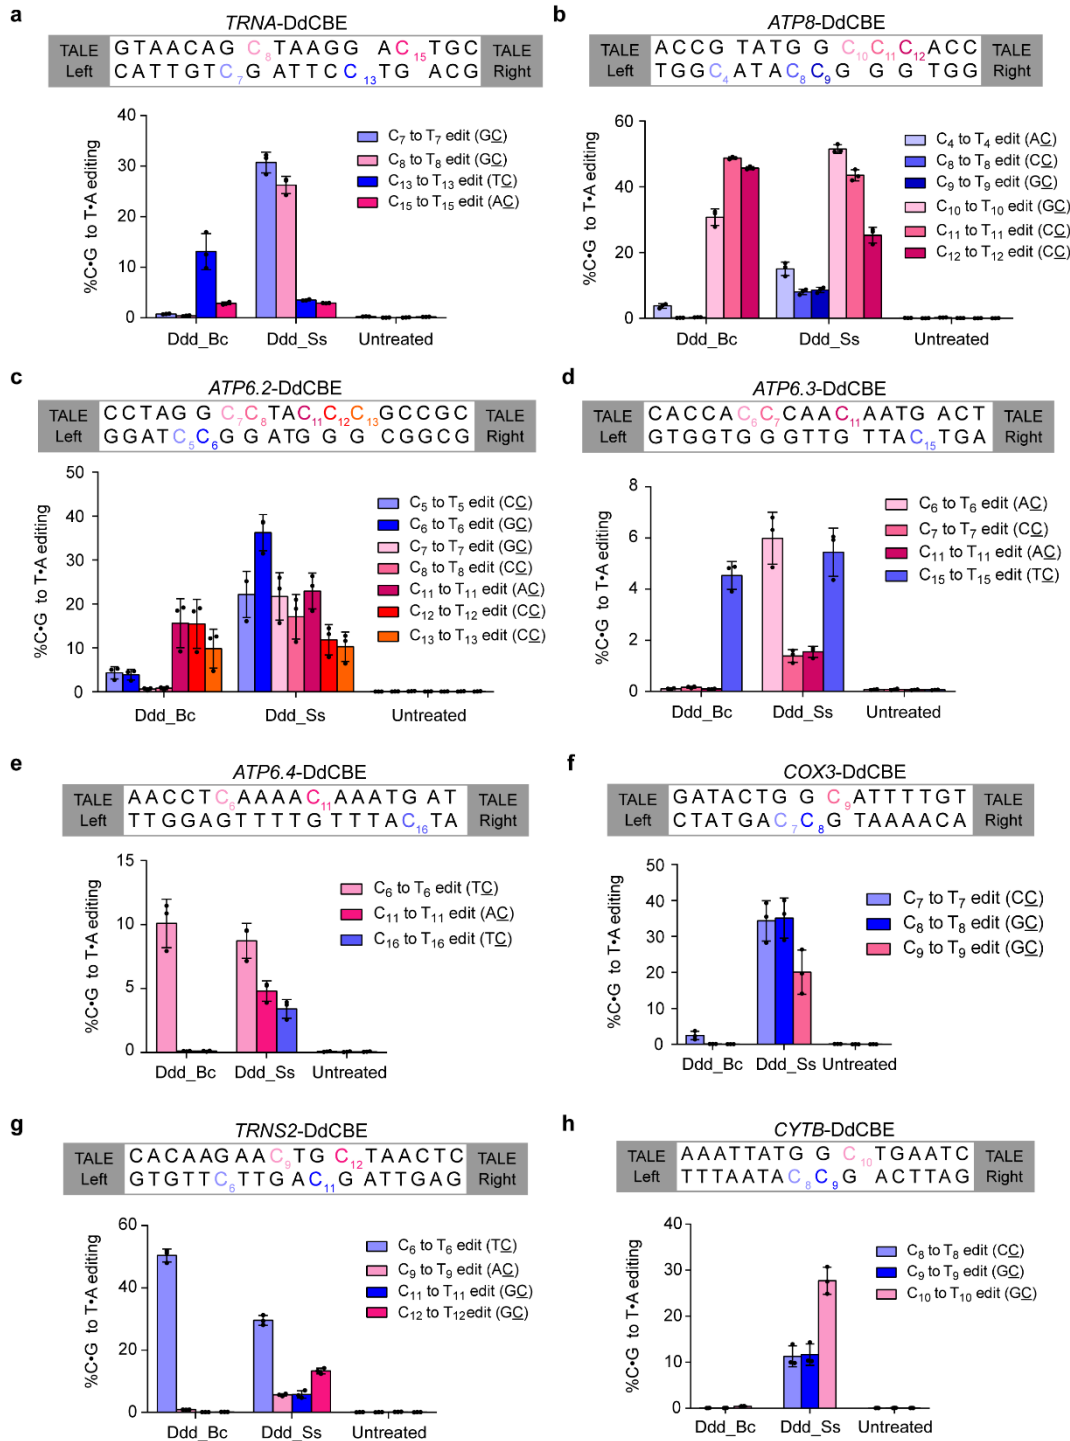

**Supplementary Fig. 4 | Ddd\_Ss enable efficient editing at 8 mitochondrial DNA sites. a-h,** mtDNA editing efficiencies of HEK293T cells treated with *TRNA*-DdCBE (a), *ATP8*-DdCBE (b), *ATP6.2*-DdCBE (c), *ATP6.3*-DdCBE (d), *ATP6.4*-DdCBE (e), *COX3*-DdCBE (f), *TRNS2*-DdCBE (g), *CYTB*-DdCBE (h). Shown are mean  $\pm$  SD; n = 3 independent experiments. Source data are provided as a Source Data file.

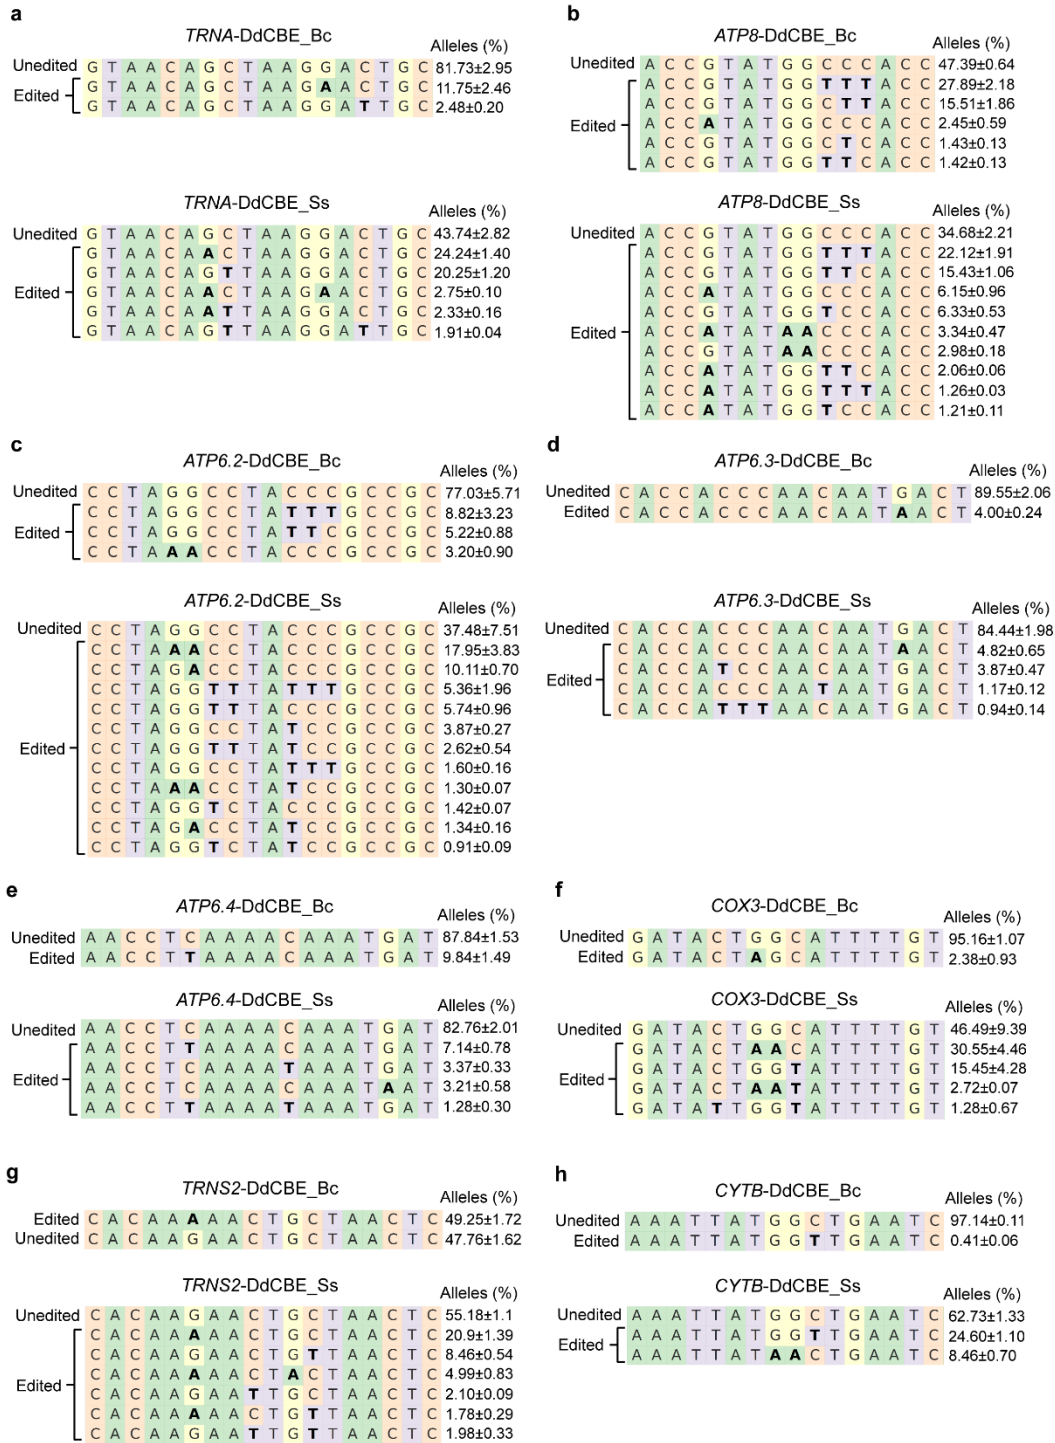

**Supplementary Fig. 5 | Allele compositions for 8 mitochondrial DNA sites edited by DdCBE\_Bc or DdCBE\_Ss. a-h, Frequencies of DdCBE edited alleles produced by *TRNA*-DdCBE (a), *ATP8*-DdCBE (b), *ATP6.2*-DdCBE (c), *ATP6.3*-DdCBE (d), *ATP6.4*-DdCBE (e), *COX3*-DdCBE (f), *TRNS2*-DdCBE (g), *CYT B*-DdCBE (h). Shown are mean ± SD; n = 3 independent experiments.**

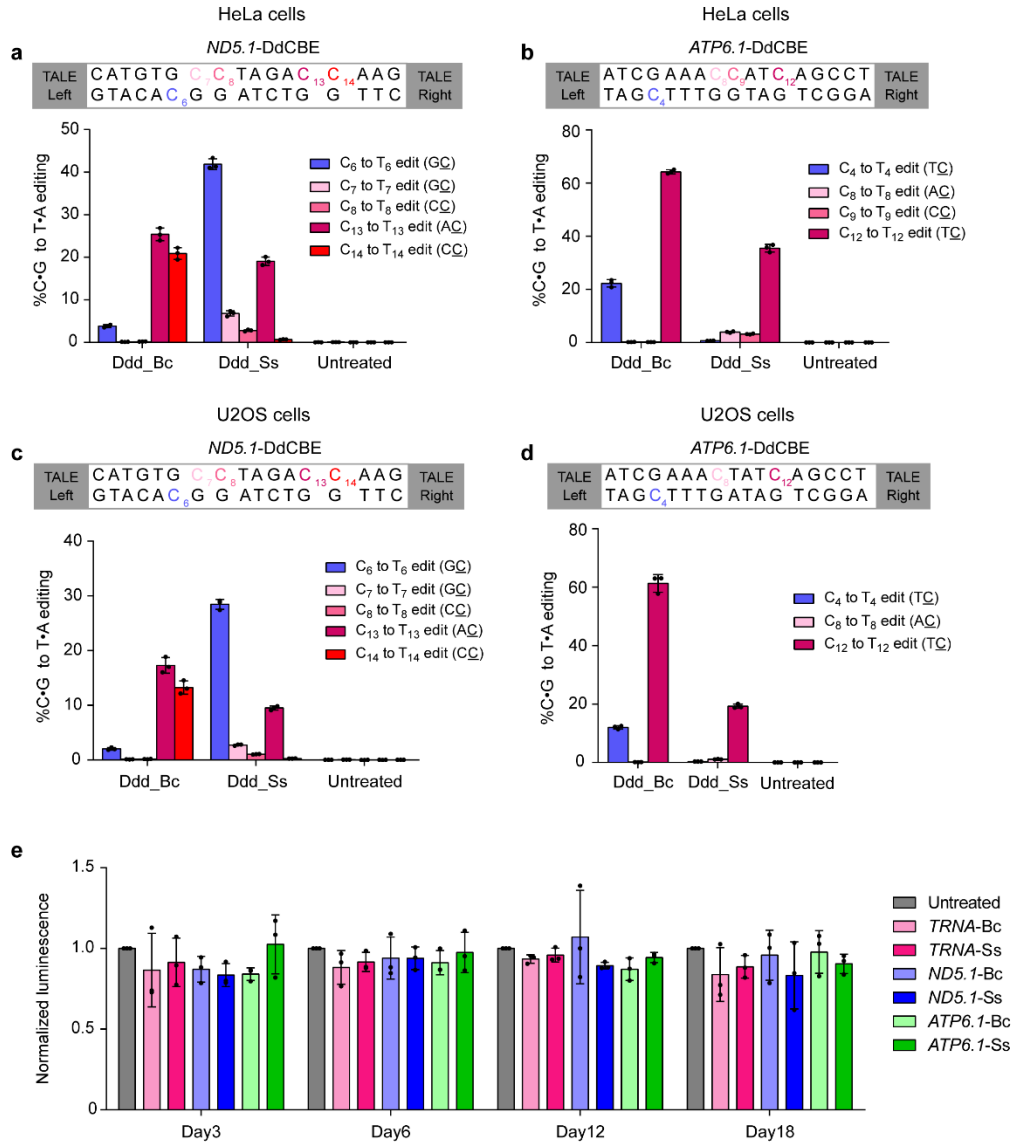

**Supplementary Fig. 6 | DdCBE\_Ss can enable mitochondrial base editing in other human cell lines.** **a, b**, mtDNA editing efficiencies of HeLa cells treated with *ND5.1*-DdCBE (**a**) and *ATP6.1*-DdCBE (**b**). **c, d**, mtDNA editing efficiencies of U2OS cells treated with *ND5.1*-DdCBE (**c**) and *ATP6.1*-DdCBE (**d**). Shown are mean  $\pm$  SD; n = 3 independent experiments. **e**, Cell viability was measured by recording the luminescence in HEK293T cells at various days after treated with DdCBE\_Bc or DdCBE\_Ss targeting different mtDNA loci. The values were normalized to the untreated samples from the same day. Shown are mean  $\pm$  SD; n = 3 independent experiments. Source data are provided as a Source Data file.



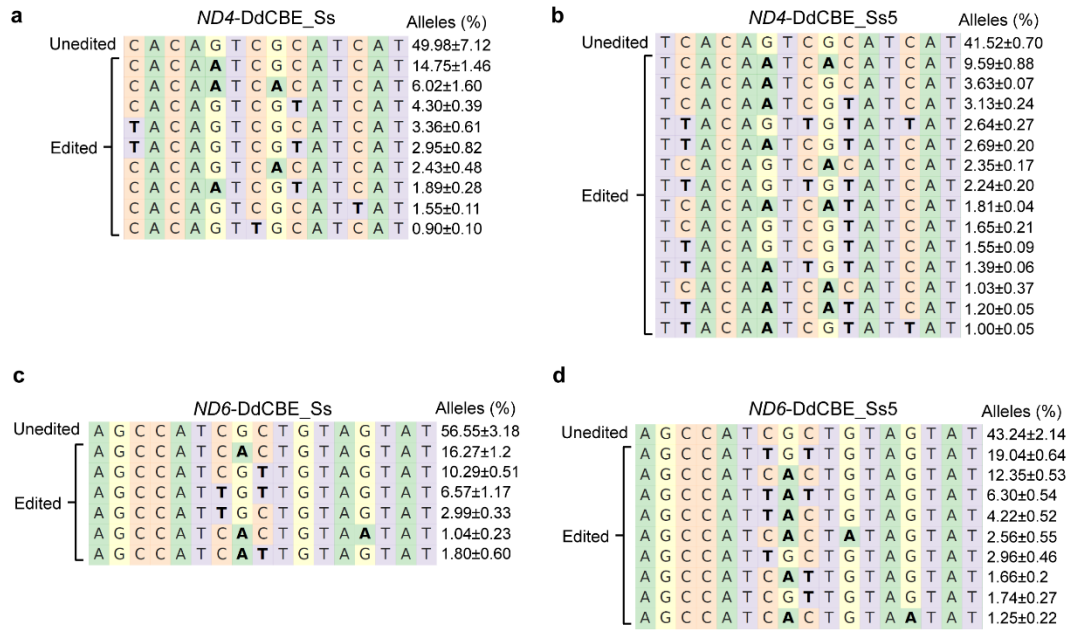

**Supplementary Fig. 7 | Allele compositions from mitochondrial editing by ND4-DdCBEs and ND6-DdCBEs. a, b,** Frequencies of *MT-ND4* alleles produced by *ND4-DdCBE\_Ss* (a) or *ND4-DdCBE\_Ss5* (b). **c, d,** Frequencies of *MT-ND6* alleles produced by *ND6-DdCBE\_Ss* (c) or *ND6-DdCBE\_Ss5* (d). Shown are mean ± SD. n = 3 independent experiments.



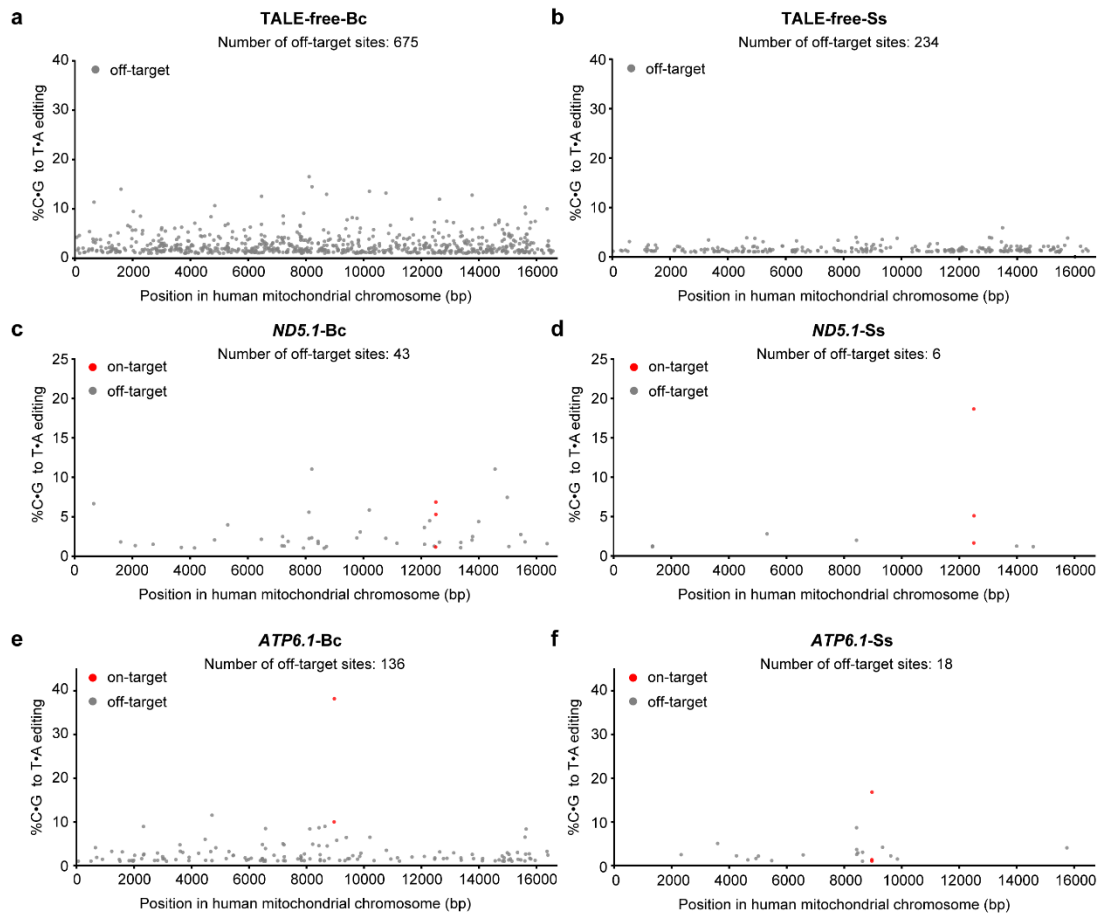

**Supplementary Fig. 9 | The C•G to T•A editing frequency in mitochondrial genome of HEK293T cells treated with different DdCBEs. a-f,** Average C•G to T•A editing efficiency of on-target (red dots) and off-target (gray dots) sites across mtDNA are shown for HEK293T cells treated with (a) DdCBE\_Bc without TALE arrays, (b) DdCBE\_Ss without TALE arrays, (c) *ND5.1*-DdCBE\_Bc, (d) *ND5.1*-DdCBE\_Ss, (e) *ATP6.1*-DdCBE\_Bc, and (f) *ATP6.1*-DdCBE\_Ss. Sites with average editing frequency greater than 1% are shown. Data are shown as means from n = 2 independent experiments. Source data are provided as a Source Data file.

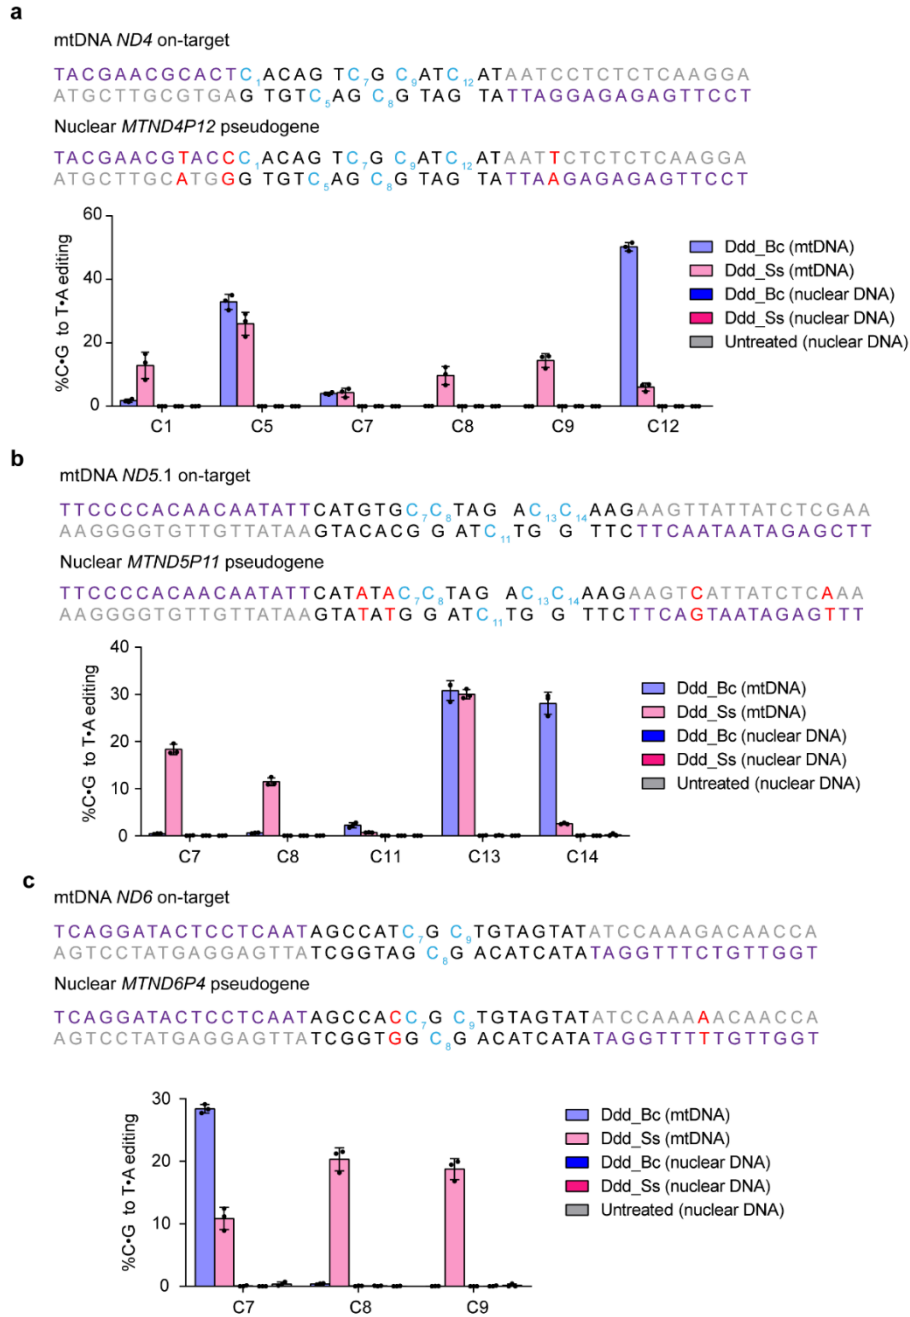

**Supplementary Fig. 10 | Off-target editing activity of DdCBEs in nuclear genome of HEK293T**

**cells. a-c,** The on-target editing site in mtDNA and the corresponding sites in nuclear DNA with the greatest homology are shown for *ND4*-DdCBE (a), *ND5.1*-DdCBE (b) and *ND6*-DdCBE (c). TALE binding sites are shown in purple. Target cytosines are in blue. Nucleotide mismatches between the mtDNA and nuclear pseudogenes are in red. Shown are mean  $\pm$  SD; n = 3 independent experiments.

Source data are provided as a Source Data file.

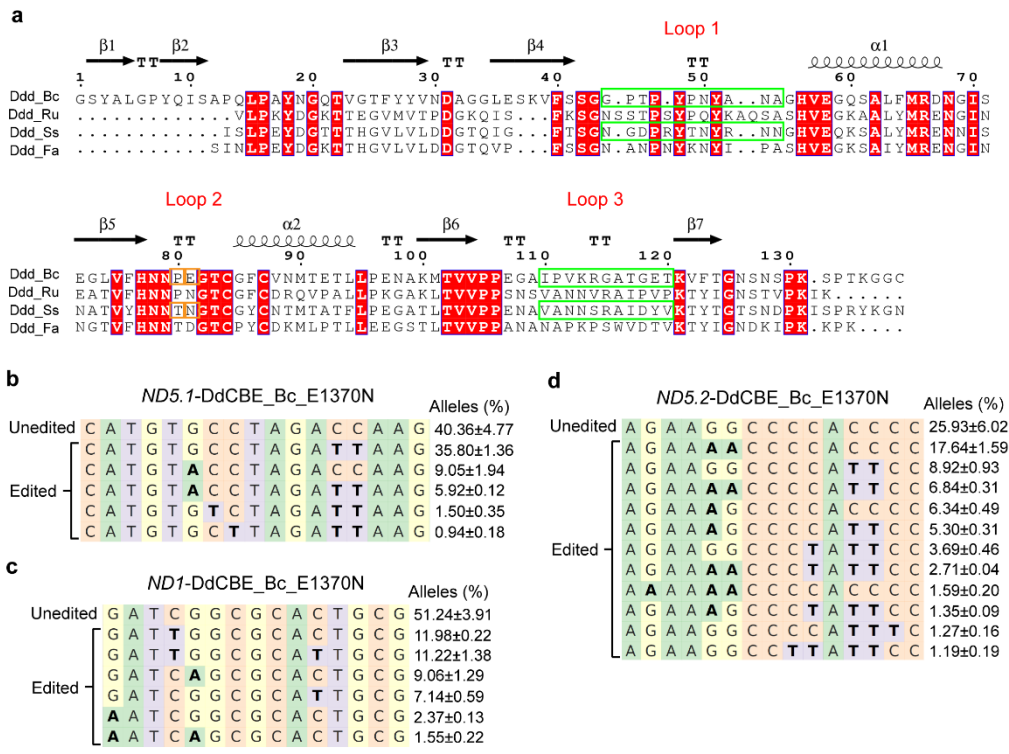

**Supplementary Fig. 11 | E1370N mutation extensively increases the editing efficiency and sequence compatibility of DdCBE\_Bc. a**, Multiple alignment of Ddd\_Bc, Ddd\_Ru, Ddd\_Ss and Ddd\_Fa. Secondary structure elements are presented on top according to Ddd\_Bc structure; helices with squiggles,  $\beta$ -strands with arrows, and turns with TT letters. Loop numbers are manually designated. Two orange boxes mark two amino acids P1369 and E1370 in Ddd\_Bc and corresponding amino acids in Ddd\_Ss. Green boxes mark the sequences that are used to make Ddd\_Bc\_L1 and Ddd\_Bc\_L3 variants. **b-d**, Frequencies of DdCBE edited alleles produced by ND5.1-DdCBE\_Bc\_E1370N (**b**), ND1-DdCBE\_Bc\_E1370N (**c**), ND5.2-DdCBE\_Bc\_E1370N (**d**). Shown are mean  $\pm$  SD; n = 3 independent experiments.

**Supplementary Table 1 | Primers for HTS of on-target sites targeted by DdCBE.**

| Site              | HTS forward primer                                                         | HTS reverse primer                                                      |
|-------------------|----------------------------------------------------------------------------|-------------------------------------------------------------------------|
| ND1               | CCTACACGACGCTCTTCCGATCTNNNN<br>NNAGCCTAGCCGTTTACTCAATCCTCT<br>G            | G TTCAGACGTGTGCTCTTCCGATCTGG<br>GTGGAGAGGTTAAAGGAGCCAC                  |
| TRNA              | CCTACACGACGCTCTTCCGATCTNNNN<br>NNGGTTAAATACAGACCAAGAGCCTTC<br>AAAGCC       | G TTCAGACGTGTGCTCTTCCGATCTGG<br>CTTAGCTTAATTAAGTGGCTGATTGCG<br>G        |
| ATP8              | CCTACACGACGCTCTTCCGATCTNNNN<br>NNCTAGAGCCCCTGTAAAGCTAACTT<br>AGC           | G TTCAGACGTGTGCTCTTCCGATCTCT<br>TTGGTGAGGGAGGTAGGTGGTAG                 |
| ATP6.1            | CCTACACGACGCTCTTCCGATCTNNNN<br>NNGCCCTAGCCCACTTCTTACCACAAG                 | G TTCAGACGTGTGCTCTTCCGATCTGG<br>CCTGCAGTAATGTTAGCGGTTAGG                |
| ATP6.2            | CCTACACGACGCTCTTCCGATCTNNNN<br>NNCCCTGAGAACCAAAATGAACGAAAA<br>TCTG         | G TTCAGACGTGTGCTCTTCCGATCTGG<br>GTGGTGATTAGTCGGTTGTTGATG                |
| ATP6.3/<br>ATP6.4 | CCTACACGACGCTCTTCCGATCTNNNN<br>NNCTATTTCCCCCTCTATTGATCCCCAC                | G TTCAGACGTGTGCTCTTCCGATCTGT<br>CCGAGGAGGTTAGTTGTGGC                    |
| COX3              | CCTACACGACGCTCTTCCGATCTNNNN<br>NNCCGCCAACTAATATTTCACTTTACAT<br>CCAAACATCAC | G TTCAGACGTGTGCTCTTCCGATCTGA<br>GTAAGACCCTCATCAATAGATGGAGAC<br>ATACAG   |
| ND4               | CCTACACGACGCTCTTCCGATCTNNNN<br>NNCATAATCGCCCACGGGCTTACATCC                 | G TTCAGACGTGTGCTCTTCCGATCTGC<br>TAGAAGTCATCAAAAAGCTATTAGTGG<br>GAGTAGAG |
| TRNS2             | CCTACACGACGCTCTTCCGATCTNNNN<br>NNGTGAATCTGACAACAGAGGCTTACG<br>ACC          | G TTCAGACGTGTGCTCTTCCGATCTGG<br>CCTAAGACCAATGGATAGCTGTTATCC             |
| ND5.1             | CCTACACGACGCTCTTCCGATCTNNNN<br>NNCCATTGTGCGATCCACCTTTATTATC<br>AGTCTC      | G TTCAGACGTGTGCTCTTCCGATCTGT<br>AGTCTAGTTTGAAGCTTAGGGAGAGCT<br>GG       |
| ND5.2             | CCTACACGACGCTCTTCCGATCTNNNN<br>NNGCAGCAGGCAAATCAGCCCAATTAG                 | G TTCAGACGTGTGCTCTTCCGATCTGG<br>AAGCGGATGAGTAAGAAGATTCTGC               |
| ND6               | CCTACACGACGCTCTTCCGATCTNNNN<br>NNCTACCAAGACCTCAACCCCTGAC                   | G TTCAGACGTGTGCTCTTCCGATCTCT<br>GAATTTTGGGGAGGTTATATGGGTTT<br>AATAG     |
| CYTb              | CCTACACGACGCTCTTCCGATCTNNNN<br>NNTGCACTACTACCAGACGCCTCAAC                  | G TTCAGACGTGTGCTCTTCCGATCTCC<br>CGATGTGTAGGAAGAGGCAG                    |

**Supplementary Table 2 | Primers for HTS of off-target sites in pseudogens.**

| <b>Name</b>                         | <b>Forward primer</b>                                                | <b>Reverse primer</b>                                           |
|-------------------------------------|----------------------------------------------------------------------|-----------------------------------------------------------------|
| Pseudogene<br>MTND4P12/5P1<br>1/6P4 | CTAATTCTCTTTGAGGAGCATGGTT<br>AG                                      | TATCACTTCCAGCCACCTATTTCC                                        |
| MTND4P12-<br>HTS                    | CCTACACGACGCTCTTCCGATCTNN<br>NNNNGTCGCCACGGACTTACATC<br>CTCATTAC     | G TTCAGACGTGTGCTCTTCCGATCT<br>GGCGAGATTAGTGAGGCTTGCTAG<br>AAGTC |
| MTND5P11-<br>HTS                    | CCTACACGACGCTCTTCCGATCTNN<br>NNNNCCATTAAGTAAAATCCATTA<br>TCGCATCCACC | G TTCAGACGTGTGCTCTTCCGATCT<br>GTTTGAAGCTTAGGGAGAGTTGGGT<br>TG   |
| MTND6P4-HTS                         | CCTACACGACGCTCTTCCGATCTNN<br>NNNNCACTTACCAAGACCTCAACCC<br>CTGACCC    | G TTCAGACGTGTGCTCTTCCGATCT<br>TTCTGAATTACGGGGGAGGTTACAT<br>GGG  |

**Supplementary Note 1 | Sequences used to construct DdCBE architecture, *ND5.1*-DdCBE and TALE amino acid sequences.**

**TXN2 MTS**

MAQRLLRRFLASVISRKPSQGQWPPLTSRALQTPQCSPGGLTVTPNPARTIYTTRISLT

**HA**

YPYDVPDYA

**FLAG**

DYKDDDDK

**N-Ddd\_Bc\_G1397**

GSYALGPYQISAPQLPAYNGQTVGTFYVNDAGGLESKVFSSGGPTYPNYANAGHVE  
GQSALFMRDNGISEGLVFHNNPEGTCGFCVNMETLLPENAKMTVVPPEG

**C-Ddd\_Bc\_G1397**

AIPVKGATGETKVFTGNSNSPKSPTKGGC

**N-Ddd\_Ss\_N94**

SLPEYDGTTHGVLVLDLDDGTQIGFTSGNGDPRYTNYRNNGHVEQKSALYMRENNISNAT  
VYHNNTNGTCGYCNTMTATFLPEGATLTVVPPEN

**C-Ddd\_Ss\_N94**

AVANNSRAIDYVKTYTGTSNDPKISPRYKGN

**N-Ddd\_Bc\_G1333**

GSYALGPYQISAPQLPAYNGQTVGTFYVNDAGGLESKVFSSGG

**C-Ddd\_Bc\_G1333**

PTYPNYANAGHVEGQSALFMRDNGISEGLVFHNNPEGTCGFCVNMETLLPENAKMT  
VVPPEGAIPVKGATGETKVFTGNSNSPKSPTKGGC

**N-Ddd\_Ss\_N29**

SLPEYDGTTHGVLVLDLDDGTQIGFTSGN

**C-Ddd\_Ss\_N29**

GDPRYTNYRNNGHVEQKSALYMRENNISNATVYHNNTNGTCGYCNTMTATFLPEGATL  
TVVPPENAVANNSRAIDYVKTYTGTSNDPKISPRYKGN

**UGI**

TNLSDIIEKETGKQLVIQESILMLPEEVEEVIGNKPESDILVHTAYDESTDENVMLLTSDAPE  
YKPWALVIQDSNGENKIKML

**T2A**

GSGEGRGSLTTCGDVEENPGP

**GFP**

MVSKGEELFTGVVPILVELDGDVNGHKFSVSGEGEGDATYGKLTLLKFICTTGKLPVPWP  
TLVTTLTLYGVQCFSRYPDHMKQHDFFKSAMPEGYVQERTIFFKDDGNYKTRAEVKFEQ  
DTLVNRIELKGIDFKEDGNILGHKLEYNYNSHNVYIMADKQKNGIKVNFKIRHNIEDGSVQ  
LADHYQQNTPIGDGPVLLPDNHYLSTQSALSQKDPNEKRDHMLLEFVTAAGITLGMDEL  
YK

**mCherry**

MVSKGEEDNMAIIKEFMRFKVMHEGVSNGHEFEIEGEGEGRPYEGTQTAKLKVTKGGP



LPFAWDILSPQFMYGSKAYVKHPADIPDYLKLSFPEGFKWERVMNFEDGGVVTVTQDSS  
LQDGEFIYKVKLRGTNFPDGPVMQKKTMGWEASSERMYPEDGALKGEIKQRLKLDG  
GHYDAEVKTTYKAKKPVQLPGAYNVNIKLDITSHNEDYTIVEQYERAEGRHSTGGMDEL  
YK

2aa linker

GS

4aa linker

SGGS

The general architecture of left-side halves of DdCBEs (from N- to C-terminus):

**TXN2 MTS**-**HA**-**TALE**-2aa linker-**Ddd\_Bc/Ddd\_Ss half**-4aa linker-**UGI**-T2A-**GFP**

The general architecture of right-side halves of DdCBEs (from N- to C-terminus):

**TXN2 MTS**-**FLAG**-**TALE**-2aa linker-**Ddd\_Bc/Ddd\_Ss half**-4aa linker-**UGI**-T2A-**GFP**

ND5.1-DdCBE\_Bc\_G1397-Left:

**MAQRLLRRFLASVISRKPSQGQWPPLTSRALQTPQCSPGGLTVTPNPARTIYTTRISLT**  
**YPYDVPDYA**SGASVDLRTLGYSSQQQEKIKPKVRSSTVAQHHEALVGHGFTHAHIVAL**S**  
**QHPAALGTVAVKYQDMIAALPEATHEAIVGVGKQWSGARALEALLTVAGELRGPPLQL**  
**DTGQLLKIAKRGGVTAVEAVHAWRNALTGAPLNLTPEQVVAIASNNGGKQALETVQRLL**  
PVLCQAHGLTPEQVVAIASHDGGKQALETVQRLLPVLCQAHGLTPEQVVAIASHDGGKQ  
ALETVQRLLPVLCQAHGLTPEQVVAIASHDGGKQALETVQRLLPVLCQAHGLTPEQVVAI  
ASHDGGKQALETVQRLLPVLCQAHGLTPEQVVAIASNIGGKQALETVQRLLPVLCQAHG  
LTPEQVVAIASHDGGKQALETVQRLLPVLCQAHGLTPEQVVAIASNIGGKQALETVQRLL  
PVLCQAHGLTPEQVVAIASNIGGKQALETVQRLLPVLCQAHGLTPEQVVAIASHDGGKQA  
LETVQRLLPVLCQAHGLTPEQVVAIASNIGGKQALETVQRLLPVLCQAHGLTPEQVVAIAS  
NIGGKQALETVQRLLPVLCQAHGLTPEQVVAIASNNGGKQALETVQRLLPVLCQAHGLT  
PEQVVAIASNIGGKQALETVQRLLPVLCQAHGLTPEQVVAIASNNGGKQALETVQRLLPV  
LCQAHGLTPEQVVAIASNNGGKQALES**SIVAQLSRPDPALAALTNDHLVALACLGGRPAL**  
**DAVKKGLGGS**GSYALGPYQISAPQLPAYNGQTVGTFYYVNDAGGLESKVFSSGGPTPY  
**PNYANAGHVEGQSALFMRDNGISEGLVFHNNPEGTGFCVNMETLLPENAKMTVPP**  
**EGSGGSTNLSDIIEKETGKQLVIQESILMLPEEVVEEVIGNKPESDILVHTAYDESTDENVML**  
**LTSDAPEYKPWALVIQDSNGENKIKML**SGVDGSGEGRGSLLTCGDVEENPGPPVATMVS  
KGEELFTGVVPILVELDGDVNGHKFSVSGEGEGDATYGKLTCLKFICTTGKLPVPWPTLVT  
TLTYGVQCFSRYPDHMKQHDFFKSAMPEGYVQERTIFFKDDGNYKTRAEVKFECDTLV  
NRIELKGIDFKEDGNILGHKLEYNYNSHNVYIMADKQKNGIKVNFKIRHNIEDGSQLADH  
YQQNTPIGDGPVLLPDNHYLSTQSALS KDPNEKRDHMLLEFVTAAGITLGMDELYKLE

ND5.1-DdCBE\_Bc\_G1397-Right:

**MAQRLLRRFLASVISRKPSQGQWPPLTSRALQTPQCSPGGLTVTPNPARTIYTTRISLT**  
**DYKDDDDK**SGASVDLRTLGYSSQQQEKIKPKVRSSTVAQHHEALVGHGFTHAHIVAL**SQ**  
**HPAALGTVAVKYQDMIAALPEATHEAIVGVGKQWSGARALEALLTVAGELRGPPLQLD**  
**TGQLLKIAKRGGVTAVEAVHAWRNALTGAPLNLTPEQVVAIASNNGGKQALETVQRLLP**

VLCQAHGLTPEQVVAIASHDGGKQALETVQRLLPVLCQAHGLTPEQVVAIASNNGGKQA  
LETVQRLLPVLCQAHGLTPEQVVAIASNIGGKQALETVQRLLPVLCQAHGLTPEQVVAIAS  
NNGGKQALETVQRLLPVLCQAHGLTPEQVVAIASNIGGKQALETVQRLLPVLCQAHGLT  
PEQVVAIASNNGGKQALETVQRLLPVLCQAHGLTPEQVVAIASNIGGKQALETVQRLLPV  
LCQAHGLTPEQVVAIASNIGGKQALETVQRLLPVLCQAHGLTPEQVVAIASNNGGKQALET  
TVQRLLPVLCQAHGLTPEQVVAIASNIGGKQALETVQRLLPVLCQAHGLTPEQVVAIASNI  
GGKQALETVQRLLPVLCQAHGLTPEQVVAIASHDGGKQALETVQRLLPVLCQAHGLTPE  
QVVAIASNNGGKQALETVQRLLPVLCQAHGLTPEQVVAIASNNGGKQALESIVAQLSRP  
**DPALAALTNDHLVALACLGGRPALDAVKKGLGGS**AIPVKRGATGETKVFTGNSNSPKS  
**PTKGGC**SGGSTNLSDIIEKETGKQLVIQESILMLPEEVEEVIGNKPESDILVHTAYDESTDE  
NMMLTSDAPEYKPWALVIQDSNGENKIKMLSGVDGSGEGRGSLTTCGDVEENPGPPV  
ATMVSKEELFTGVVPILVELDGDVNGHKFSVSGEGEGDATYGKLTLCFICTTGKLPVPW  
PTLVTTLTLYGVQCFSTRYPDHMKQHDFFKSAMPEGYVQERTIFFKDDGNYKTRAEVKFE  
GDTLVNRIELKGIDFKEDGNILGHKLEYNYNSHNVYIMADKQKNGIKVNFKIRHNIEDGSV  
QLADHYQQNTPIGDGPVLLPDNHVLTQSALS KDPNEKRDMVLLFVTAAGITLGMDE  
LYKLE

When construct DdCBE without T2A-GFP sequence, the underlined sequence was removed.

When construct DdCBE with T2A-mCherry sequence, the GFP sequence was replaced by mCherry sequence.

ND5.1-DdCBE\_Ss\_N94-Left:

MAQRLLRRFLASVISRKPSQGQWPPLTSRALQTPQCSPGGLTVPNPARTIYTTRISLT  
YPYDVPDYASGASVDLRTLGYSSQQQEKIKPKVRSTVAQHHEALVGHGFTHAHIVALS  
QHPAALGTAVKYQDMIAALPEATHEAIVGVGKQWSGARALEALLTVAGELRGPPLQL  
DTGQLLKIAKRGGVTAVEAVHAWRNALTGAPLNLTPEQVVAIASNNGGKQALETVQRLL  
PVLCQAHGLTPEQVVAIASHDGGKQALETVQRLLPVLCQAHGLTPEQVVAIASHDGGKQ  
ALETVQRLLPVLCQAHGLTPEQVVAIASHDGGKQALETVQRLLPVLCQAHGLTPEQVVAI  
ASHDGGKQALETVQRLLPVLCQAHGLTPEQVVAIASNIGGKQALETVQRLLPVLCQAHG  
LTPEQVVAIASHDGGKQALETVQRLLPVLCQAHGLTPEQVVAIASNIGGKQALETVQRLL  
PVLCQAHGLTPEQVVAIASNIGGKQALETVQRLLPVLCQAHGLTPEQVVAIASHDGGKQA  
LETVQRLLPVLCQAHGLTPEQVVAIASNIGGKQALETVQRLLPVLCQAHGLTPEQVVAIAS  
NIGGKQALETVQRLLPVLCQAHGLTPEQVVAIASNNGGKQALETVQRLLPVLCQAHGLT  
PEQVVAIASNIGGKQALETVQRLLPVLCQAHGLTPEQVVAIASNNGGKQALETVQRLLPV  
LCQAHGLTPEQVVAIASNNGGKQALESIVAQLSRPDPALAALTNDHLVALACLGGRPAL  
DAVKKGLGGS**SLPEYDGTTHGVLVDDGTQIGFTSGNGDPRYTNYRNNGHVEQKSAL**  
**YMRENNISNATVYHNNTNGTCGYCNTMTATFLPEGATLTVPPEN**SGGSTNLSDIIEKET  
GKQLVIQESILMLPEEVEEVIGNKPESDILVHTAYDESTDENMMLTSDAPEYKPWALVIQ  
DSNGENKIKMLSGVDGSGEGRGSLTTCGDVEENPGPPVATMVSKEELFTGVVPILVEL  
DGDVNGHKFSVSGEGEGDATYGKLTLCFICTTGKLPVPWPTLVTTLTLYGVQCFSTRYPDH  
MKQHDFFKSAMPEGYVQERTIFFKDDGNYKTRAEVKFEGDTLVNRIELKGIDFKEDGNIL  
GHKLEYNYNSHNVYIMADKQKNGIKVNFKIRHNIEDGSVQLADHYQQNTPIGDGPVLLP

DNHYLSTQSALS KDPNEKRDH MVLL E FVTAAGITLGMDELYKLE

ND5.1-DdCBE\_Ss\_N94-Right:

MAQRLLRRFLASVISRKPSQGWPPPLTSRALQTPQCSPGGLTVPNPARTIYTTRISLT  
DYKDDDDKSGASVDLRTLGYSSQQQEKIKPKVRSTVAQHHEALVGHGFTHAHIVALSQ  
HPAALGTVAVKYQDMIAALPEATHEAIVGVGKQWSGARALEALLTVAGELRGPPLQLD  
TGQLLKIAKRGGVTAVEAVHAWRNALTGAPLNLTPEQVVAIASNNGGKQALETVQRLLP  
VLCQAHGLTPEQVVAIASHDGGKQALETVQRLLPVLCQAHGLTPEQVVAIASNNGGKQA  
LETVQRLLPVLCQAHGLTPEQVVAIASNIGGKQALETVQRLLPVLCQAHGLTPEQVVAIAS  
NNGGKQALETVQRLLPVLCQAHGLTPEQVVAIASNIGGKQALETVQRLLPVLCQAHGLT  
PEQVVAIASNNGGKQALETVQRLLPVLCQAHGLTPEQVVAIASNIGGKQALETVQRLLPV  
LCQAHGLTPEQVVAIASNIGGKQALETVQRLLPVLCQAHGLTPEQVVAIASNNGGKQALET  
TVQRLLPVLCQAHGLTPEQVVAIASNIGGKQALETVQRLLPVLCQAHGLTPEQVVAIASNI  
GGKQALETVQRLLPVLCQAHGLTPEQVVAIASHDGGKQALETVQRLLPVLCQAHGLTPE  
QVVAIASNNGGKQALETVQRLLPVLCQAHGLTPEQVVAIASNNGGKQALESIVAQLSRP  
DPALAALTNDHLVALACLGGRPALDAVKKGLGSSAVANNSRAIDYVKTYTGTSDPKIS  
PRYKGNSSGSTNLSDIIEKETGKQLVIQESILMLPEEVEEVIGNKPESDILVHTAYDESTDE  
NVMLLSDAPEYKPWALVIQDSNGENKIKMLSGVDGSGEGRGSLTTCGDVEENPGPPV  
ATMVSKEELFTGVVPILVELDGDVNGHKFSVSGEGEGDATYGKLT LKFICTTGKLPVPW  
PTLVTTLTGYVQCFSRYPDHMKQHDFFSAMPEGYVQERTIFFKDDGNYKTRAEVKFE  
GDTLVNRIELKGIDFKEDGNILGHKLEYNYNSHNVYIMADKQKNGIKVNFKIRHNIEDGSV  
QLADHYQQNTPIGDGPVLLPDNHYLSTQSALS KDPNEKRDH MVLL E FVTAAGITLGMDE  
LYKLE

ATP6.1-DdCBE Left mitoTALE repeat

**VDLRTLGYSSQQQEKIKPKVRSTVAQHHEALVGHGFTHAHIVALSQHPAALGTVAVKY**  
**QDMIAALPEATHEAIVGVGKQWSGARALEALLTVAGELRGPPLQLDTGQLLKIAKRGG**  
**VTAVEAVHAWRNALTGAPLNLTPEQVVAIASHDGGKQALETVQRLLPVLCQAHGLTPEQ**  
**VVAIASHDGGKQALETVQRLLPVLCQAHGLTPEQVVAIASHDGGKQALETVQRLLPVLC**  
**QAHGLTPEQVVAIASHDGGKQALETVQRLLPVLCQAHGLTPEQVVAIASNIGGKQALETV**  
**QRLLPVLCQAHGLTPEQVVAIASNNGGKQALETVQRLLPVLCQAHGLTPEQVVAIASNIG**  
**GKQALETVQRLLPVLCQAHGLTPEQVVAIASHDGGKQALETVQRLLPVLCQAHGLTPEQ**  
**VVAIASNNGGKQALETVQRLLPVLCQAHGLTPEQVVAIASNIGGKQALETVQRLLPVLCQ**  
**AHGLTPEQVVAIASNNGGKQALETVQRLLPVLCQAHGLTPEQVVAIASNNGGKQALETV**  
**QRLLPVLCQAHGLTPEQVVAIASNNGGKQALETVQRLLPVLCQAHGLTPEQVVAIASNIG**  
**GKQALETVQRLLPVLCQAHGLTPEQVVAIASNNGGKQALETVQRLLPVLCQAHGLTPEQ**  
**VVAIASNNGGKQALESIVAQLSRPDPALAALTNDHLVALACLGGRPALDAVKKGLG**

ATP6.1-DdCBE Right mitoTALE repeat

**VDLRTLGYSSQQQEKIKPKVRSTVAQHHEALVGHGFTHAHIVALSQHPAALGTVAVKY**  
**QDMIAALPEATHEAIVGVGKQWSGARALEALLTVAGELRGPPLQLDTGQLLKIAKRGG**  
**VTAVEAVHAWRNALTGAPLNLTPEQVVAIASNIGGKQALETVQRLLPVLCQAHGLTPEQ**

VVAIASNGGGKQALETVQRLLPVLCQAHGLTPEQVVAIASNGGGKQALETVQRLLPVLC  
QAHGLTPEQVVAIASNNGGKQALETVQRLLPVLCQAHGLTPEQVVAIASNNGGKQALET  
VQRLLPVLCQAHGLTPEQVVAIASNGGGKQALETVQRLLPVLCQAHGLTPEQVVAIASN  
GGGKQALETVQRLLPVLCQAHGLTPEQVVAIASNNGGKQALETVQRLLPVLCQAHGLT  
EQVVAIASNIGGKQALETVQRLLPVLCQAHGLTPEQVVAIASNIGGKQALETVQRLLPVLC  
QAHGLTPEQVVAIASNGGGKQALETVQRLLPVLCQAHGLTPEQVVAIASNNGGKQALET  
VQRLLPVLCQAHGLTPEQVVAIASNIGGKQALETVQRLLPVLCQAHGLTPEQVVAIASN  
GGKQALETVQRLLPVLCQAHGLTPEQVVAIASNGGGKQALET**SIVAQLSRPDPALAALTN  
DHLVALACLGRPALDAVKKGLG**

ND1-DdCBE Left mitoTALE repeat

**VDLRTLGYSSQQQEKIKPKVRSVAQHHEALVGHGFTHAHIVALSQHPAALGTVAVKY  
QDMIAALPEATHEAIVGVGKQWSGARALEALLTVAGELRGPPLQLDTGQLLKIAKRGG  
VTAVEAVHAWRNALTGAPLNLTPEQVVAIASHDGGKQALETVQRLLPVLCQAHGLTPEQ  
VVAIASNIGGKQALETVQRLLPVLCQAHGLTPEQVVAIASNIGGKQALETVQRLLPVLCQA  
HGLTPEQVVAIASNIGGKQALETVQRLLPVLCQAHGLTPEQVVAIASHDGGKQALETVQR  
LLPVLCQAHGLTPEQVVAIASNNGGKQALETVQRLLPVLCQAHGLTPEQVVAIASNIGGK  
QALETVQRLLPVLCQAHGLTPEQVVAIASHDGGKQALETVQRLLPVLCQAHGLTPEQV  
VAIASNNGGKQALETVQRLLPVLCQAHGLTPEQVVAIASHDGGKQALETVQRLLPVLCQA  
HGLTPEQVVAIASHDGGKQALETVQRLLPVLCQAHGLTPEQVVAIASHDGGKQALETVQ  
RLLPVLCQAHGLTPEQVVAIASNGGGKQALET**SIVAQLSRPDPALAALTN**DHLVALACLG  
GRPALDAVKKGLG******

ND1-DdCBE Right mitoTALE repeat

**VDLRTLGYSSQQQEKIKPKVRSVAQHHEALVGHGFTHAHIVALSQHPAALGTVAVKY  
QDMIAALPEATHEAIVGVGKQWSGARALEALLTVAGELRGPPLQLDTGQLLKIAKRGG  
VTAVEAVHAWRNALTGAPLNLTPEQVVAIASNNGGKQALETVQRLLPVLCQAHGLTPEQ  
VVAIASNNGGKQALETVQRLLPVLCQAHGLTPEQVVAIASNNGGKQALETVQRLLPVLC  
QAHGLTPEQVVAIASNNGGKQALETVQRLLPVLCQAHGLTPEQVVAIASHDGGKQALET  
VQRLLPVLCQAHGLTPEQVVAIASNNGGKQALETVQRLLPVLCQAHGLTPEQVVAIASN  
GGKQALETVQRLLPVLCQAHGLTPEQVVAIASHDGGKQALETVQRLLPVLCQAHGLTPE  
QVVAIASNNGGKQALETVQRLLPVLCQAHGLTPEQVVAIASNNGGKQALETVQRLLPVLC  
QAHGLTPEQVVAIASHDGGKQALETVQRLLPVLCQAHGLTPEQVVAIASNNGGKQALET  
**SIVAQLSRPDPALAALTN**DHLVALACLGRPALDAVKKGLG******

TRNA-DdCBE Left mitoTALE repeat

**VDLRTLGYSSQQQEKIKPKVRSVAQHHEALVGHGFTHAHIVALSQHPAALGTVAVKY  
QDMIAALPEATHEAIVGVGKQWSGARALEALLTVAGELRGPPLQLDTGQLLKIAKRGG  
VTAVEAVHAWRNALTGAPLNLTPEQVVAIASNNGGKQALETVQRLLPVLCQAHGLTPEQ  
VVAIASHDGGKQALETVQRLLPVLCQAHGLTPEQVVAIASNIGGKQALETVQRLLPVLCQ  
AHGLTPEQVVAIASNIGGKQALETVQRLLPVLCQAHGLTPEQVVAIASNNGGKQALETVQ  
RLLPVLCQAHGLTPEQVVAIASNIGGKQALETVQRLLPVLCQAHGLTPEQVVAIASHDGG**

KQALETVQRLLPVLCQAHGLTPEQVVAIASNNGGKQALETVQRLLPVLCQAHGLTPEQV  
VAIASNNGGKQALETVQRLLPVLCQAHGLTPEQVVAIASNIGGKQALETVQRLLPVLCQA  
HGLTPEQVVAIASNIGGKQALETVQRLLPVLCQAHGLTPEQVVAIASNNGGKQALETVQR  
LLPVLCQAHGLTPEQVVAIASNNGGKQALETVQRLLPVLCQAHGLTPEQVVAIASNNGG  
KQALETVQRLLPVLCQAHGLTPEQVVAIASHDGGKQALETVQRLLPVLCQAHGLTPEQV  
VAIASNNGGKQALE**SIVAQLSRPDPALAALTNDHLVALACLGGRPALDAVKKGLG**

TRNA-DdCBE Right mitoTALE repeat

**VDLRTLGYSSQQQEKIKPKVRSVAQHHEALVGHGFTHAHIVALSQHPAALGTVAVKY**  
**QDMIAALPEATHEAIVGVGKQWSGARALEALLTVAGELRGPPLQLDTGQLLKIAKRGG**  
**VTAVEAVHAWRNALTGAPLNLTPEQVVAIASNNGGKQALETVQRLLPVLCQAHGLTPEQ**  
VVAIASHDGGKQALETVQRLLPVLCQAHGLTPEQVVAIASNIGGKQALETVQRLLPVLCQ  
AHGLTPEQVVAIASNNGGKQALETVQRLLPVLCQAHGLTPEQVVAIASNIGGKQALETVQ  
RLLPVLCQAHGLTPEQVVAIASNNGGKQALETVQRLLPVLCQAHGLTPEQVVAIASNNG  
GKQALETVQRLLPVLCQAHGLTPEQVVAIASNNGGKQALETVQRLLPVLCQAHGLTPEQ  
VVAIASNNGGKQALETVQRLLPVLCQAHGLTPEQVVAIASNNGGKQALETVQRLLPVLC  
QAHGLTPEQVVAIASNNGGKQALETVQRLLPVLCQAHGLTPEQVVAIASNNGGKQALET  
VQRLLPVLCQAHGLTPEQVVAIASNNGGKQALETVQRLLPVLCQAHGLTPEQVVAIASN  
GGGKQALETVQRLLPVLCQAHGLTPEQVVAIASNNGGKQALE**SIVAQLSRPDPALAALT**  
**NDHLVALACLGGRPALDAVKKGLG**

ATP8-DdCBE Left mitoTALE repeat

**VDLRTLGYSSQQQEKIKPKVRSVAQHHEALVGHGFTHAHIVALSQHPAALGTVAVKY**  
**QDMIAALPEATHEAIVGVGKQWSGARALEALLTVAGELRGPPLQLDTGQLLKIAKRGG**  
**VTAVEAVHAWRNALTGAPLNLTPEQVVAIASNNGGKQALETVQRLLPVLCQAHGLTPEQ**  
VVAIASHDGGKQALETVQRLLPVLCQAHGLTPEQVVAIASHDGGKQALETVQRLLPVLC  
QAHGLTPEQVVAIASHDGGKQALETVQRLLPVLCQAHGLTPEQVVAIASHDGGKQALET  
VQRLLPVLCQAHGLTPEQVVAIASNIGGKQALETVQRLLPVLCQAHGLTPEQVVAIASNIG  
GKQALETVQRLLPVLCQAHGLTPEQVVAIASHDGGKQALETVQRLLPVLCQAHGLTPEQ  
VVAIASNNGGKQALETVQRLLPVLCQAHGLTPEQVVAIASNIGGKQALETVQRLLPVLCQ  
AHGLTPEQVVAIASNIGGKQALETVQRLLPVLCQAHGLTPEQVVAIASNIGGKQALETVQ  
RLLPVLCQAHGLTPEQVVAIASNNGGKQALETVQRLLPVLCQAHGLTPEQVVAIASNIGG  
KQALETVQRLLPVLCQAHGLTPEQVVAIASHDGGKQALETVQRLLPVLCQAHGLTPEQV  
VAIASNNGGKQALE**SIVAQLSRPDPALAALTNDHLVALACLGGRPALDAVKKGLG**

ATP8-DdCBE Right mitoTALE repeat

**VDLRTLGYSSQQQEKIKPKVRSVAQHHEALVGHGFTHAHIVALSQHPAALGTVAVKY**  
**QDMIAALPEATHEAIVGVGKQWSGARALEALLTVAGELRGPPLQLDTGQLLKIAKRGG**  
**VTAVEAVHAWRNALTGAPLNLTPEQVVAIASNIGGKQALETVQRLLPVLCQAHGLTPEQ**  
VVAIASNNGGKQALETVQRLLPVLCQAHGLTPEQVVAIASNNGGKQALETVQRLLPVLC  
QAHGLTPEQVVAIASNNGGKQALETVQRLLPVLCQAHGLTPEQVVAIASNNGGKQALET  
VQRLLPVLCQAHGLTPEQVVAIASNNGGKQALETVQRLLPVLCQAHGLTPEQVVAIASN  
GGGKQALETVQRLLPVLCQAHGLTPEQVVAIASNNGGKQALETVQRLLPVLCQAHGLTPEQVVAIASN

GGKQALETVQRLLPVLCQAHGLTPEQVVAIASNNGGKQALETVQRLLPVLCQAHGLTPE  
QVVAIASNIGGKQALETVQRLLPVLCQAHGLTPEQVVAIASNIGGKQALETVQRLLPVLC  
QAHGLTPEQVVAIASNNGGKQALETVQRLLPVLCQAHGLTPEQVVAIASNNGGKQALET  
VQRLLPVLCQAHGLTPEQVVAIASNIGGKQALETVQRLLPVLCQAHGLTPEQVVAIASNG  
GGKQALES**SIVAQLSRPDPALAALTNDHLVALACLGGRPALDAVKKGLG**

[ATP6.2-DdCBE Left mitoTALE repeat](#)

**VDLRTLGYSSQQQEIKPKVVRSTVAQHHEALVGHGFTHAHIVALSQHPAALGTVAVKY  
QDMIAALPEATHEAIVGVGKQWSGARALEALLTVAGELRGPPLQLDTGQLLKIAKRGG  
VTAVEAVHAWRNALTGAPLNLTPEQVVAIASNNGGKQALETVQRLLPVLCQAHGLTPEQ  
VVAIASNNGGKQALETVQRLLPVLCQAHGLTPEQVVAIASHDGGKQALETVQRLLPVLC  
QAHGLTPEQVVAIASHDGGKQALETVQRLLPVLCQAHGLTPEQVVAIASHDGGKQALET  
VQRLLPVLCQAHGLTPEQVVAIASHDGGKQALETVQRLLPVLCQAHGLTPEQVVAIASHD  
GGKQALETVQRLLPVLCQAHGLTPEQVVAIASNIGGKQALETVQRLLPVLCQAHGLTPE  
QVVAIASHDGGKQALETVQRLLPVLCQAHGLTPEQVVAIASNIGGKQALETVQRLLPVLC  
QAHGLTPEQVVAIASNIGGKQALETVQRLLPVLCQAHGLTPEQVVAIASNNGGKQALES**SI  
VAQLSRPDPALAALTNDHLVALACLGGRPALDAVKKGLG****

[ATP6.2-DdCBE Right mitoTALE repeat](#)

**VDLRTLGYSSQQQEIKPKVVRSTVAQHHEALVGHGFTHAHIVALSQHPAALGTVAVKY  
QDMIAALPEATHEAIVGVGKQWSGARALEALLTVAGELRGPPLQLDTGQLLKIAKRGG  
VTAVEAVHAWRNALTGAPLNLTPEQVVAIASNIGGKQALETVQRLLPVLCQAHGLTPEQ  
VVAIASNNGGKQALETVQRLLPVLCQAHGLTPEQVVAIASNIGGKQALETVQRLLPVLCQ  
AHGLTPEQVVAIASNIGGKQALETVQRLLPVLCQAHGLTPEQVVAIASNNGGKQALETVQ  
RLLPVLCQAHGLTPEQVVAIASNNGGKQALETVQRLLPVLCQAHGLTPEQVVAIASNIGG  
KQALETVQRLLPVLCQAHGLTPEQVVAIASNNGGKQALETVQRLLPVLCQAHGLTPEQV  
VAIASHDGGKQALETVQRLLPVLCQAHGLTPEQVVAIASNIGGKQALETVQRLLPVLCQA  
HGLTPEQVVAIASNNGGKQALETVQRLLPVLCQAHGLTPEQVVAIASNNGGKQALETVQ  
RLLPVLCQAHGLTPEQVVAIASNIGGKQALETVQRLLPVLCQAHGLTPEQVVAIASHDGG  
KQALETVQRLLPVLCQAHGLTPEQVVAIASNNGGKQALES**SIVAQLSRPDPALAALTNDH  
LVALACLGGRPALDAVKKGLG****

[ATP6.3-DdCBE Left mitoTALE repeat](#)

**VDLRTLGYSSQQQEIKPKVVRSTVAQHHEALVGHGFTHAHIVALSQHPAALGTVAVKY  
QDMIAALPEATHEAIVGVGKQWSGARALEALLTVAGELRGPPLQLDTGQLLKIAKRGG  
VTAVEAVHAWRNALTGAPLNLTPEQVVAIASHDGGKQALETVQRLLPVLCQAHGLTPEQ  
VVAIASNIGGKQALETVQRLLPVLCQAHGLTPEQVVAIASNIGGKQALETVQRLLPVLCQA  
HGLTPEQVVAIASHDGGKQALETVQRLLPVLCQAHGLTPEQVVAIASNIGGKQALETVQR  
LLPVLCQAHGLTPEQVVAIASNIGGKQALETVQRLLPVLCQAHGLTPEQVVAIASHDGGK  
QALETVQRLLPVLCQAHGLTPEQVVAIASHDGGKQALETVQRLLPVLCQAHGLTPEQV  
VAIASNNGGKQALETVQRLLPVLCQAHGLTPEQVVAIASNIGGKQALETVQRLLPVLCQA  
HGLTPEQVVAIASHDGGKQALETVQRLLPVLCQAHGLTPEQVVAIASNNGGKQALETVQR**

LLPVLCQAHGLTPEQVVAIASNIGGKQALETVQRLLPVLCQAHGLTPEQVVAIASNIGGKQ  
ALETVQRLLPVLCQAHGLTPEQVVAIASNNGGKQALE**SIVAQLSRPDPALAALTNDHLVA  
LACLGRPALDAVKKGLG**

ATP6.3-DdCBE Right mitoTALE repeat

**VDLRTLGYSSQQQEKIKPKVRSVAQHHEALVGHGFTHAHIVALSQHPAALGTVAVKY  
QDMIAALPEATHEAIVGVGKQWSGARALEALLTVAGELRGPPLQLDTGQLLKIAKRGG  
VTAVEAVHAWRNALTGAPLNLTPEQVVAIASNNGGKQALETVQRLLPVLCQAHGLTPEQ  
VVAIASNIGGKQALETVQRLLPVLCQAHGLTPEQVVAIASNNGGKQALETVQRLLPVLCQ  
AHGLTPEQVVAIASNNGGKQALETVQRLLPVLCQAHGLTPEQVVAIASNNGGKQALETV  
QRLLPVLCQAHGLTPEQVVAIASNNGGKQALETVQRLLPVLCQAHGLTPEQVVAIASNIG  
GKQALETVQRLLPVLCQAHGLTPEQVVAIASNNGGKQALETVQRLLPVLCQAHGLTPEQ  
VVAIASNNGGKQALETVQRLLPVLCQAHGLTPEQVVAIASNNGGKQALETVQRLLPVLC  
QAHGLTPEQVVAIASNNGGKQALETVQRLLPVLCQAHGLTPEQVVAIASNNGGKQALET  
VQRLLPVLCQAHGLTPEQVVAIASNIGGKQALETVQRLLPVLCQAHGLTPEQVVAIASN  
GGKQALETVQRLLPVLCQAHGLTPEQVVAIASNNGGKQALE**SIVAQLSRPDPALAALT  
NDHLVALACLGRPALDAVKKGLG****

ATP6.4-DdCBE Left mitoTALE repeat

**VDLRTLGYSSQQQEKIKPKVRSVAQHHEALVGHGFTHAHIVALSQHPAALGTVAVKY  
QDMIAALPEATHEAIVGVGKQWSGARALEALLTVAGELRGPPLQLDTGQLLKIAKRGG  
VTAVEAVHAWRNALTGAPLNLTPEQVVAIASNNGGKQALETVQRLLPVLCQAHGLTPEQ  
VVAIASNIGGKQALETVQRLLPVLCQAHGLTPEQVVAIASHDGGKQALETVQRLLPVLCQ  
AHGLTPEQVVAIASNNGGKQALETVQRLLPVLCQAHGLTPEQVVAIASNIGGKQALETVQ  
RLLPVLCQAHGLTPEQVVAIASNIGGKQALETVQRLLPVLCQAHGLTPEQVVAIASNNGG  
KQALETVQRLLPVLCQAHGLTPEQVVAIASHDGGKQALETVQRLLPVLCQAHGLTPEQV  
VAIASNIGGKQALETVQRLLPVLCQAHGLTPEQVVAIASNIGGKQALETVQRLLPVLCQAH  
GLTPEQVVAIASNIGGKQALETVQRLLPVLCQAHGLTPEQVVAIASHDGGKQALETVQRL  
LPVLCQAHGLTPEQVVAIASNNGGKQALE**SIVAQLSRPDPALAALTNDHLVALACLGRP  
PALDAVKKGLG****

ATP6.4-DdCBE Right mitoTALE repeat

**VDLRTLGYSSQQQEKIKPKVRSVAQHHEALVGHGFTHAHIVALSQHPAALGTVAVKY  
QDMIAALPEATHEAIVGVGKQWSGARALEALLTVAGELRGPPLQLDTGQLLKIAKRGG  
VTAVEAVHAWRNALTGAPLNLTPEQVVAIASNIGGKQALETVQRLLPVLCQAHGLTPEQ  
VVAIASNNGGKQALETVQRLLPVLCQAHGLTPEQVVAIASNNGGKQALETVQRLLPVLC  
QAHGLTPEQVVAIASNNGGKQALETVQRLLPVLCQAHGLTPEQVVAIASNNGGKQALET  
VQRLLPVLCQAHGLTPEQVVAIASNNGGKQALETVQRLLPVLCQAHGLTPEQVVAIASN  
NNGKQALETVQRLLPVLCQAHGLTPEQVVAIASNNGGKQALETVQRLLPVLCQAHGLT  
EQVVAIASNNGGKQALETVQRLLPVLCQAHGLTPEQVVAIASNNGGKQALETVQRLLPV  
LCQAHGLTPEQVVAIASNIGGKQALETVQRLLPVLCQAHGLTPEQVVAIASNNGGKQALE  
TVQRLLPVLCQAHGLTPEQVVAIASNNGGKQALETVQRLLPVLCQAHGLTPEQVVAIASN**

NGGKQALETVQRLLPVLCQAHGLTPEQVVAIASNNGGKQALETVQRLLPVLCQAHGLTPEQVVAIASNNGGKQALE**SIVAQLSRPDPALAALTNDHLVALACLGGRPALDAVKKGLG**

COX3-DdCBE Left mitoTALE repeat

**VDLRTLGYSSQQQEKIKPKVRSTVAQHHEALVGHGFTHAHIVALSQHPAALGTVAVKY**  
**QDMIAALPEATHEAIVGVGKQWSGARALEALLTVAGELRGPPLQLDTGQLLKIAKRGG**  
**VTAVEAVHAWRNALTGAPLNLTPEQVVAIASHDGGKQALETVQRLLPVLCQAHGLTPEQ**  
VVAIASNNGGKQALETVQRLLPVLCQAHGLTPEQVVAIASNIGGKQALETVQRLLPVLCQ  
AHGLTPEQVVAIASNIGGKQALETVQRLLPVLCQAHGLTPEQVVAIASNNGGKQALETVQ  
RLLPVLCQAHGLTPEQVVAIASHDGGKQALETVQRLLPVLCQAHGLTPEQVVAIASHDG  
GKQALETVQRLLPVLCQAHGLTPEQVVAIASNNGGKQALETVQRLLPVLCQAHGLTPEQ  
VVAIASHDGGKQALETVQRLLPVLCQAHGLTPEQVVAIASHDGGKQALETVQRLLPVLC  
QAHGLTPEQVVAIASNNGGKQALETVQRLLPVLCQAHGLTPEQVVAIASHDGGKQALET  
VQRLLPVLCQAHGLTPEQVVAIASHDGGKQALETVQRLLPVLCQAHGLTPEQVVAIASN  
GGGKQALE**SIVAQLSRPDPALAALTNDHLVALACLGGRPALDAVKKGLG**

COX3-DdCBE Right mitoTALE repeat

**VDLRTLGYSSQQQEKIKPKVRSTVAQHHEALVGHGFTHAHIVALSQHPAALGTVAVKY**  
**QDMIAALPEATHEAIVGVGKQWSGARALEALLTVAGELRGPPLQLDTGQLLKIAKRGG**  
**VTAVEAVHAWRNALTGAPLNLTPEQVVAIASNIGGKQALETVQRLLPVLCQAHGLTPEQ**  
VVAIASNNGGKQALETVQRLLPVLCQAHGLTPEQVVAIASNNGGKQALETVQRLLPVLC  
QAHGLTPEQVVAIASHDGGKQALETVQRLLPVLCQAHGLTPEQVVAIASNIGGKQALETV  
QRLLPVLCQAHGLTPEQVVAIASNIGGKQALETVQRLLPVLCQAHGLTPEQVVAIASNIGG  
KQALETVQRLLPVLCQAHGLTPEQVVAIASHDGGKQALETVQRLLPVLCQAHGLTPEQV  
VAIASHDGGKQALETVQRLLPVLCQAHGLTPEQVVAIASNIGGKQALETVQRLLPVLCQA  
HGLTPEQVVAIASHDGGKQALETVQRLLPVLCQAHGLTPEQVVAIASNIGGKQALETVQR  
LLPVLCQAHGLTPEQVVAIASNNGGKQALETVQRLLPVLCQAHGLTPEQVVAIASHDGG  
KQALETVQRLLPVLCQAHGLTPEQVVAIASNNGGKQALE**SIVAQLSRPDPALAALTNDH**  
**LVALACLGGRPALDAVKKGLG**

ND4-DdCBE Left mitoTALE repeat

**VDLRTLGYSSQQQEKIKPKVRSTVAQHHEALVGHGFTHAHIVALSQHPAALGTVAVKY**  
**QDMIAALPEATHEAIVGVGKQWSGARALEALLTVAGELRGPPLQLDTGQLLKIAKRGG**  
**VTAVEAVHAWRNALTGAPLNLTPEQVVAIASNIGGKQALETVQRLLPVLCQAHGLTPEQ**  
VVAIASHDGGKQALETVQRLLPVLCQAHGLTPEQVVAIASNNGGKQALETVQRLLPVLC  
QAHGLTPEQVVAIASNIGGKQALETVQRLLPVLCQAHGLTPEQVVAIASNIGGKQALETV  
QRLLPVLCQAHGLTPEQVVAIASHDGGKQALETVQRLLPVLCQAHGLTPEQVVAIASNN  
GGKQALETVQRLLPVLCQAHGLTPEQVVAIASHDGGKQALETVQRLLPVLCQAHGLTPE  
QVVAIASNIGGKQALETVQRLLPVLCQAHGLTPEQVVAIASHDGGKQALETVQRLLPVLC  
QAHGLTPEQVVAIASNNGGKQALE**SIVAQLSRPDPALAALTNDHLVALACLGGRPALDA**  
**VKKGLG**



ND4-DdCBE Right mitoTALE repeat

**VDLRTLGYSSQQQEKIKPKVRSTVAQHHEALVGHGFTHAHIVALSQHPAALGTVAVKY  
QDMIAALPEATHEAIVGVGKQWSGARALEALLTVAGELRGPPLQLDTGQLLKIAKRGG  
VTAVEAVHAWRNALTGAPLNLTPEQVVAIASHDGGKQALETVQRLLPVLCQAHGLTPEQ  
VVAIASHDGGKQALETVQRLLPVLCQAHGLTPEQVVAIASNNGGGKQALETVQRLLPVLC  
QAHGLTPEQVVAIASNNGGGKQALETVQRLLPVLCQAHGLTPEQVVAIASNNGGGKQALET  
VQRLLPVLCQAHGLTPEQVVAIASNIGGGKQALETVQRLLPVLCQAHGLTPEQVVAIASNN  
GGKQALETVQRLLPVLCQAHGLTPEQVVAIASNIGGGKQALETVQRLLPVLCQAHGLTPE  
QVVAIASNNGGGKQALETVQRLLPVLCQAHGLTPEQVVAIASNIGGGKQALETVQRLLPVLC  
QAHGLTPEQVVAIASNNGGGKQALETVQRLLPVLCQAHGLTPEQVVAIASNNGGGKQALET  
VQRLLPVLCQAHGLTPEQVVAIASNIGGGKQALETVQRLLPVLCQAHGLTPEQVVAIASNG  
GGKQALETVQRLLPVLCQAHGLTPEQVVAIASNNGGGKQALE**SIVAQLSRPDPALAALTN  
DHLVALACLGGRPALDAVKKGLG****

TRNS2-DdCBE Left mitoTALE repeat

**VDLRTLGYSSQQQEKIKPKVRSTVAQHHEALVGHGFTHAHIVALSQHPAALGTVAVKY  
QDMIAALPEATHEAIVGVGKQWSGARALEALLTVAGELRGPPLQLDTGQLLKIAKRGG  
VTAVEAVHAWRNALTGAPLNLTPEQVVAIASNIGGGKQALETVQRLLPVLCQAHGLTPEQ  
VVAIASHDGGKQALETVQRLLPVLCQAHGLTPEQVVAIASHDGGKQALETVQRLLPVLC  
QAHGLTPEQVVAIASNNGGGKQALETVQRLLPVLCQAHGLTPEQVVAIASNIGGGKQALETV  
QRLLPVLCQAHGLTPEQVVAIASNNGGGKQALETVQRLLPVLCQAHGLTPEQVVAIASNIG  
GKQALETVQRLLPVLCQAHGLTPEQVVAIASNIGGGKQALETVQRLLPVLCQAHGLTPEQV  
VAIASNIGGGKQALETVQRLLPVLCQAHGLTPEQVVAIASNNGGGKQALETVQRLLPVLCQA  
HGLTPEQVVAIASHDGGKQALETVQRLLPVLCQAHGLTPEQVVAIASNNGGGKQALE**SIVA  
QLSRPDPALAALTN**DHLVALACLGGRPALDAVKKGLG**

TRNS2-DdCBE Right mitoTALE repeat

**VDLRTLGYSSQQQEKIKPKVRSTVAQHHEALVGHGFTHAHIVALSQHPAALGTVAVKY  
QDMIAALPEATHEAIVGVGKQWSGARALEALLTVAGELRGPPLQLDTGQLLKIAKRGG  
VTAVEAVHAWRNALTGAPLNLTPEQVVAIASNIGGGKQALETVQRLLPVLCQAHGLTPEQ  
VVAIASNNGGGKQALETVQRLLPVLCQAHGLTPEQVVAIASNIGGGKQALETVQRLLPVLCQ  
AHGLTPEQVVAIASHDGGKQALETVQRLLPVLCQAHGLTPEQVVAIASNIGGGKQALETVQ  
RLLPVLCQAHGLTPEQVVAIASNNGGGKQALETVQRLLPVLCQAHGLTPEQVVAIASNNG  
GKQALETVQRLLPVLCQAHGLTPEQVVAIASNNGGGKQALETVQRLLPVLCQAHGLTPEQ  
VVAIASNNGGGKQALETVQRLLPVLCQAHGLTPEQVVAIASNNGGGKQALETVQRLLPVLC  
QAHGLTPEQVVAIASNNGGGKQALETVQRLLPVLCQAHGLTPEQVVAIASHDGGKQALET  
VQRLLPVLCQAHGLTPEQVVAIASNIGGGKQALETVQRLLPVLCQAHGLTPEQVVAIASNG  
GGKQALE**SIVAQLSRPDPALAALTN**DHLVALACLGGRPALDAVKKGLG**

ND5.2-DdCBE Left mitoTALE repeat

**VDLRTLGYSSQQQEKIKPKVRSTVAQHHEALVGHGFTHAHIVALSQHPAALGTVAVKY  
QDMIAALPEATHEAIVGVGKQWSGARALEALLTVAGELRGPPLQLDTGQLLKIAKRGG**

**VTAVEAVHAWRNALTGAPLNLTPEQVVAIASHDGGKQALETVQRLLPVLCQAHGLTPEQ  
VVAIASHDGGKQALETVQRLLPVLCQAHGLTPEQVVAIASHDGGKQALETVQRLLPVLC  
QAHGLTPEQVVAIASHDGGKQALETVQRLLPVLCQAHGLTPEQVVAIASNNGGKQALET  
VQRLLPVLCQAHGLTPEQVVAIASHDGGKQALETVQRLLPVLCQAHGLTPEQVVAIASNI  
GGKQALETVQRLLPVLCQAHGLTPEQVVAIASNNGGKQALETVQRLLPVLCQAHGLTPE  
QVVAIASHDGGKQALETVQRLLPVLCQAHGLTPEQVVAIASHDGGKQALETVQRLLPVLC  
QAHGLTPEQVVAIASNIGGKQALETVQRLLPVLCQAHGLTPEQVVAIASNNGGKQALE  
SIVAQLSRPDPALAALTNDHLVALACLGGRPALDAVKKGLG**

ND5.2-DdCBE Right mitoTALE repeat

**VDLRTLGYSSQQQEIKIPKVRSTVAQHHEALVGHGFTHAHIVALSQHPAALGTVAVKY  
QDMIAALPEATHEAIVGVGKQWSGARALEALLTVAGELRGPPLQLDTGQLLKIAKRGG  
VTAVEAVHAWRNALTGAPLNLTPEQVVAIASNIGGKQALETVQRLLPVLCQAHGLTPEQ  
VVAIASNNGGKQALETVQRLLPVLCQAHGLTPEQVVAIASNNGGKQALETVQRLLPVLC  
QAHGLTPEQVVAIASNNGGKQALETVQRLLPVLCQAHGLTPEQVVAIASHDGGKQALET  
VQRLLPVLCQAHGLTPEQVVAIASNNGGKQALETVQRLLPVLCQAHGLTPEQVVAIASN  
NNGGKQALETVQRLLPVLCQAHGLTPEQVVAIASNIGGKQALETVQRLLPVLCQAHGLT  
EQVVAIASNNGGKQALETVQRLLPVLCQAHGLTPEQVVAIASNIGGKQALETVQRLLPVLC  
QAHGLTPEQVVAIASHDGGKQALETVQRLLPVLCQAHGLTPEQVVAIASNNGGKQALE  
SIVAQLSRPDPALAALTNDHLVALACLGGRPALDAVKKGLG**

ND6-DdCBE Left mitoTALE repeat

**VDLRTLGYSSQQQEIKIPKVRSTVAQHHEALVGHGFTHAHIVALSQHPAALGTVAVKY  
QDMIAALPEATHEAIVGVGKQWSGARALEALLTVAGELRGPPLQLDTGQLLKIAKRGG  
VTAVEAVHAWRNALTGAPLNLTPEQVVAIASHDGGKQALETVQRLLPVLCQAHGLTPEQ  
VVAIASNIGGKQALETVQRLLPVLCQAHGLTPEQVVAIASNNGGKQALETVQRLLPVLCQ  
AHGLTPEQVVAIASNNGGKQALETVQRLLPVLCQAHGLTPEQVVAIASNIGGKQALETVQ  
RLLPVLCQAHGLTPEQVVAIASNNGGKQALETVQRLLPVLCQAHGLTPEQVVAIASNIGG  
KQALETVQRLLPVLCQAHGLTPEQVVAIASHDGGKQALETVQRLLPVLCQAHGLTPEQV  
VAIASNNGGKQALETVQRLLPVLCQAHGLTPEQVVAIASHDGGKQALETVQRLLPVLCQ  
AHGLTPEQVVAIASHDGGKQALETVQRLLPVLCQAHGLTPEQVVAIASNNGGKQALETV  
QRLLPVLCQAHGLTPEQVVAIASHDGGKQALETVQRLLPVLCQAHGLTPEQVVAIASNIG  
GKQALETVQRLLPVLCQAHGLTPEQVVAIASNIGGKQALETVQRLLPVLCQAHGLTPEQV  
VAIASNNGGKQALE SIVAQLSRPDPALAALTNDHLVALACLGGRPALDAVKKGLG**

ND6-DdCBE Right mitoTALE repeat

**VDLRTLGYSSQQQEIKIPKVRSTVAQHHEALVGHGFTHAHIVALSQHPAALGTVAVKY  
QDMIAALPEATHEAIVGVGKQWSGARALEALLTVAGELRGPPLQLDTGQLLKIAKRGG  
VTAVEAVHAWRNALTGAPLNLTPEQVVAIASNNGGKQALETVQRLLPVLCQAHGLTPEQ  
VVAIASNNGGKQALETVQRLLPVLCQAHGLTPEQVVAIASNNGGKQALETVQRLLPVLC  
QAHGLTPEQVVAIASNNGGKQALETVQRLLPVLCQAHGLTPEQVVAIASNNGGKQALET  
VQRLLPVLCQAHGLTPEQVVAIASNNGGKQALETVQRLLPVLCQAHGLTPEQVVAIASH**



**Supplementary Note 2 | Ddd\_Bc and Ddd\_Ss variants used to construct DdCBEs.**

**Ddd\_Ss1 (T26I+T77I+T110I)**

SLPEYDGTTHHGVVLVDDGTQIGFI|SGNGDPRYTNYRNNGHVEQKSALYMRENNISNAT  
VYHNNTNGTCGYCNTMI|ATFLPEGATLTVVPPENAVANNSRAIDYVKTYI|GTSNDPKISPR  
YKGN

**Ddd\_Ss2 (T26I)**

SLPEYDGTTHHGVVLVDDGTQIGFI|SGNGDPRYTNYRNNGHVEQKSALYMRENNISNAT  
VYHNNTNGTCGYCNTMTATFLPEGATLTVVPPENAVANNSRAIDYVKTYTGT|SNDPKISP  
RYKGN

**Ddd\_Ss3 (T77I)**

SLPEYDGTTHHGVVLVDDGTQIGFTSGNGDPRYTNYRNNGHVEQKSALYMRENNISNAT  
VYHNNTNGTCGYCNTMI|ATFLPEGATLTVVPPENAVANNSRAIDYVKTYTGT|SNDPKISP  
RYKGN

**Ddd\_Ss4 (T110I)**

SLPEYDGTTHHGVVLVDDGTQIGFTSGNGDPRYTNYRNNGHVEQKSALYMRENNISNAT  
VYHNNTNGTCGYCNTMTATFLPEGATLTVVPPENAVANNSRAIDYVKTYI|GTSNDPKISP  
RYKGN

**Ddd\_Ss5 (T77I+T110I)**

SLPEYDGTTHHGVVLVDDGTQIGFTSGNGDPRYTNYRNNGHVEQKSALYMRENNISNAT  
VYHNNTNGTCGYCNTMI|ATFLPEGATLTVVPPENAVANNSRAIDYVKTYI|GTSNDPKISPR  
YKGN

**Ddd\_Bc\_L1**

GSYALGPYQISAPQLPAYNGQTVGTFYVNDAGGLESKVFSSG**NGDPRYTNYRNNGHV**  
EGQSALFMRDNGISEGLVFHNNPEGTCGFCVNMETLLPENAKMTVVPPEGAIPVKRG  
ATGETKVFTGNSNSPKSPTKGGC

**Ddd\_Bc\_P1369T**

GSYALGPYQISAPQLPAYNGQTVGTFYVNDAGGLESKVFSSGGPTYPNYANAGHVE  
GQSALFMRDNGISEGLVFHNN**T**EGTCGFCVNMETLLPENAKMTVVPPEGAIPVKRGAT  
GETKVFTGNSNSPKSPTKGGC

**Ddd\_Bc\_E1370N**

GSYALGPYQISAPQLPAYNGQTVGTFYVNDAGGLESKVFSSGGPTYPNYANAGHVE  
GQSALFMRDNGISEGLVFHNNP**N**GTCGFCVNMETLLPENAKMTVVPPEGAIPVKRGA  
TGETKVFTGNSNSPKSPTKGGC

**Ddd\_Bc\_L3**

GSYALGPYQISAPQLPAYNGQTVGTFYVNDAGGLESKVFSSGGPTYPNYANAGHVE  
GQSALFMRDNGISEGLVFHNNPEGTCGFCVNMETLLPENAKMTVVPPEGA**VANNSRAI**  
**DYV**KVFTGNSNSPKSPTKGGC

**Supplementary Note 3 | Flow cytometric pseudo-color plots showing gating strategy.** The cells were initially gated on population using SSC-A/FSC-A (Gate A), then sorted for single cells using FSC-W/FSC-H (Gate Single Cell). Double positive live cells were sorted by gating mCherry-positive and GFP-positive cells (Gate Double Positive). Untreated HEK293T cells were employed as negative control for generating gate Double Positive.

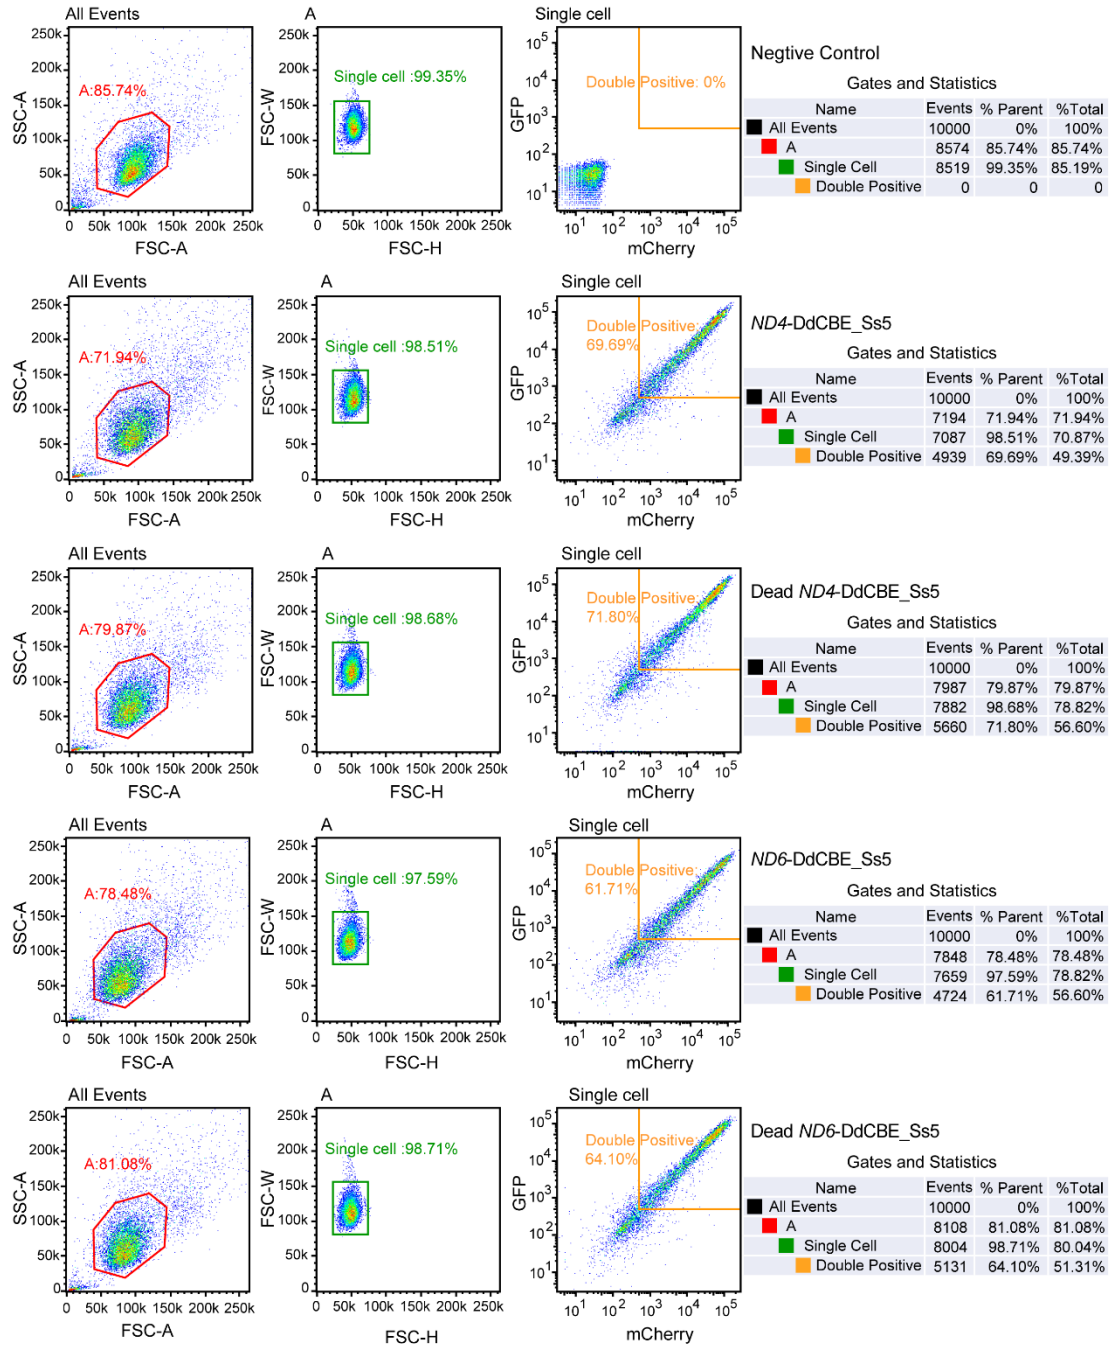

Supplement: 41467_2023_36600_MOESM1_ESM.pdf [file 41467_2023_36600_MOESM1_ESM.pdf]
