# Supplementary material for: DddA homolog search and engineering expand sequence compatibility of mitochondrial base editing
Source: PubMed Central journal article supplement (PMC9935910; doi:10.1038/s41467-023-36600-2), 2023-02-16
Supplement: 41467_2023_36600_MOESM6_ESM.pdf [file 41467_2023_36600_MOESM6_ESM.pdf]

**Title:** Supplementary Data 1

**Description:** Candidate Ddd\_Bc homologs by PSI-BLAST.

**Title:** Supplementary Data 2

**Description:** MitoTALE binding sites and editing efficiency for DdCBE.
